# Supplementary material
Source: PubMed Central journal article supplement (PMC4243044)
Supplement: NIHMS633017-supplement-14.pdf [file NIHMS633017-supplement-14.pdf]

A

| Freeze List               |                                            |                        |
|---------------------------|--------------------------------------------|------------------------|
| <b>Sample (n)</b>         |                                            | 467                    |
| <b>Age at dx (years)</b>  |                                            | 46.8 (range 15-89)     |
| <b>Year of collection</b> |                                            | 2009 (range 1993-2012) |
| <b>Gender</b>             | Male                                       | 125 ( 27%)             |
|                           | Female                                     | 342 (73%)              |
| <b>Race</b>               | White                                      | 299                    |
|                           | Black                                      | 19                     |
|                           | Asian                                      | 49                     |
|                           | American indian or alaska native           | 1                      |
|                           | Not Available                              | 99                     |
| <b>Ethnicity</b>          | Hispanic or latino                         | 37                     |
|                           | Not hispanic or latino                     | 322                    |
|                           | Not Available                              | 108                    |
| <b>Prior Tumor</b>        | Yes                                        | 26                     |
|                           | No                                         | 441                    |
| <b>Laterality</b>         | Right lobe                                 | 196                    |
|                           | Left lobe                                  | 166                    |
|                           | Bilateral                                  | 82                     |
|                           | Isthmus                                    | 18                     |
|                           | NA                                         | 5                      |
| <b>Tumor Size (cm)</b>    |                                            | 2.92                   |
| <b>Staging (TNM)</b>      | T1 : (t1(38) + t1a(20) + t1b(76) )         | 134                    |
|                           | T2                                         | 158                    |
|                           | T3                                         | 154                    |
|                           | T4 : (t4(8) + t4a (10))                    | 18                     |
|                           | TX                                         | 3                      |
| <b>Nodes</b>              | Node- (N0)                                 | 214                    |
|                           | Node- (N1 : (n1(53) + n1a(88) + n1b(66)))  | 207                    |
|                           | Node unknown (NX)                          | 46                     |
| <b>Metastasis</b>         | Mets - (M0)                                | 250                    |
|                           | Mets - (M1)                                | 8                      |
|                           | MX                                         | 208                    |
|                           | NA                                         | 1                      |
| <b>Clinical stage</b>     | Stage I                                    | 268                    |
|                           | Stage II                                   | 49                     |
|                           | Stage III                                  | 102                    |
|                           | Stage IV : ((IV (2) + Iva (39) + Ivc( 5) ) | 46                     |
|                           | NA                                         | 2                      |

Table S1A. Clinical and pathology data summary of patients.

B

| <b>Data type</b>      | <b>Platform</b>                    | <b>Primary Tumors</b> | <b>Metastatic Tumors</b> | <b>Normal Thyroid</b> |
|-----------------------|------------------------------------|-----------------------|--------------------------|-----------------------|
| Pathologic            | n.a.                               | 496                   | 8                        | 100                   |
| Clinical              | n.a.                               | 467                   | 8                        | 89                    |
| Whole exome DNA seq.  | Illumina                           | 402                   | 4                        | 73                    |
| Whole genome DNA seq. | Illumina                           | 49*                   | 0                        | 49*                   |
| DNA copy number       | Agilent                            | 496                   | 8                        | 97                    |
| Low pass DNA sequence | Illumina                           | 95                    | 0                        | 13                    |
| mRNA sequence         | Illumina                           | 482                   | 8                        | 58                    |
| miRNA sequence        | Illumina                           | 495                   | 8                        | 59                    |
| CpG DNA methylation   | Illumina Infinium Methylation 450K | 496                   | 8                        | 56                    |
| Functional proteomics | Reverse phase protein array        | 368                   | 0                        | 0                     |

\*indicates that whole genome DNA sequencing data from 49 tumours, while actually not part of the data freeze, was used to identify and confirm the presence of fusion genes.

Table S2B. Characterization platforms used, sample counts and data produced.

C

| <b>Center</b>                          | <b>SNP6 array analysis</b>                                   | <b>Exomes</b>                                                     | <b>lowpass WGS</b>                                 | <b>WGS</b>                                                        | <b>mRNA</b>                             | <b>miRNA</b>          | <b>DNA methylation</b> | <b>RPPA</b>           | <b>Other</b>          |
|----------------------------------------|--------------------------------------------------------------|-------------------------------------------------------------------|----------------------------------------------------|-------------------------------------------------------------------|-----------------------------------------|-----------------------|------------------------|-----------------------|-----------------------|
| Baylor                                 |                                                              | Mutation detection                                                |                                                    |                                                                   |                                         |                       |                        |                       |                       |
| British Columbia Cancer Agency         |                                                              | Mutation detection                                                |                                                    |                                                                   |                                         | Expression Clustering |                        |                       |                       |
| Broad Institute                        | Genotyping, CNV detection, clustering, significance analysis | Mutation detection, CNV detection, mutation significance analysis | Mutation detection, Rearrangement/fusion detection | Mutation detection, CNV detection, Rearrangement/fusion detection | Fusion Detection                        |                       |                        |                       | Significance Analysis |
| Brown University                       |                                                              |                                                                   |                                                    |                                                                   |                                         |                       |                        |                       | Pathway Analysis      |
| Harvard University                     |                                                              |                                                                   | CNV detection, mutation detection                  |                                                                   |                                         |                       |                        |                       | TERT genotyping       |
| Institute for Systems Biology          |                                                              |                                                                   |                                                    |                                                                   |                                         |                       |                        |                       | Significance Analysis |
| Johns Hopkins                          |                                                              |                                                                   |                                                    |                                                                   |                                         |                       | Clustering             |                       |                       |
| MD Anderson                            |                                                              |                                                                   |                                                    |                                                                   | Fusion Detection                        |                       |                        | Expression Clustering |                       |
| Memorial Sloan Kettering Cancer Center |                                                              |                                                                   |                                                    |                                                                   |                                         |                       |                        |                       | Pathway Analysis      |
| University of California San Diego     |                                                              |                                                                   |                                                    |                                                                   |                                         |                       |                        |                       | Pathway Analysis      |
| University of California Santa Clara   |                                                              | Mutation detection                                                |                                                    |                                                                   |                                         |                       |                        |                       |                       |
| University of California Santa Cruz    |                                                              |                                                                   |                                                    |                                                                   |                                         |                       |                        |                       | Pathway Analysis      |
| University of North Carolina           |                                                              |                                                                   |                                                    |                                                                   | Fusion Detection, Expression Clustering |                       |                        |                       |                       |

Table S1C. Analyses performed by center.
