# Supplementary material
Source: PubMed Central journal article supplement (PMC4243044)
Supplement: NIHMS633017-supplement-16.pdf [file NIHMS633017-supplement-16.pdf]

**A**

| Mutation type         | Count       |
|-----------------------|-------------|
| Frame Shift Deletion  | 196         |
| Frame Shift Insertion | 33          |
| In Frame Deletion     | 27          |
| In Frame Insertion    | 6           |
| Missense Mutation     | 4350        |
| Nonsense Mutation     | 240         |
| Nonstop Mutation      | 5           |
| Silent                | 1644        |
| Splice Site           | 215         |
| <b>Total</b>          | <b>6716</b> |

**B**

| rank | gene     | Nbase   | nmut | npat | nsite | nsil | n1 | n2 | n3 | n4  | n5 | n6 | p_ns_s    | p         | q         |
|------|----------|---------|------|------|-------|------|----|----|----|-----|----|----|-----------|-----------|-----------|
| 1    | BRAF     | 894038  | 240  | 240  | 6     | 1    | 0  | 1  | 1  | 234 | 4  | 0  | <1.00E-15 | <1.00E-15 | <1.81E-11 |
| 2    | NRAS     | 235555  | 34   | 34   | 2     | 0    | 0  | 0  | 27 | 7   | 0  | 0  | 8.81E-06  | 2.78E-15  | 2.51E-11  |
| 3    | HRAS     | 260728  | 14   | 14   | 2     | 0    | 0  | 0  | 11 | 3   | 0  | 0  | 0.094     | 1.88E-14  | 1.13E-10  |
| 4    | EIF1AX   | 177141  | 7    | 6    | 5     | 0    | 0  | 4  | 0  | 1   | 2  | 0  | 0.207     | 1.18E-11  | 5.34E-08  |
| 5    | PPM1D    | 627291  | 5    | 5    | 5     | 0    | 0  | 1  | 0  | 0   | 4  | 0  | 0.7       | 4.73E-07  | 0.00171   |
| 6    | KRAS     | 276486  | 4    | 4    | 3     | 0    | 0  | 0  | 1  | 3   | 0  | 0  | 0.414     | 3.19E-06  | 0.00861   |
| 7    | CHEK2    | 636843  | 5    | 5    | 5     | 0    | 0  | 0  | 1  | 3   | 1  | 0  | 0.333     | 3.33E-06  | 0.00861   |
| 8    | S100A7   | 126228  | 3    | 3    | 3     | 0    | 0  | 0  | 0  | 3   | 0  | 0  | 0.679     | 1.75E-05  | 0.0396    |
| 9    | TMSB15A  | 58621   | 2    | 2    | 2     | 0    | 0  | 1  | 0  | 1   | 0  | 0  | 0.592     | 4.91E-05  | 0.0987    |
| 10   | SLA      | 332301  | 3    | 3    | 3     | 0    | 0  | 0  | 1  | 0   | 2  | 0  | 0.755     | 7.82E-05  | 0.141     |
| 11   | MSI1     | 314867  | 3    | 3    | 3     | 0    | 1  | 0  | 0  | 1   | 1  | 0  | 0.502     | 0.000108  | 0.178     |
| 12   | NUP93    | 1021878 | 4    | 4    | 2     | 0    | 0  | 1  | 0  | 0   | 3  | 0  | 0.118     | 0.000135  | 0.2       |
| 13   | ADO      | 143305  | 2    | 2    | 2     | 0    | 0  | 0  | 0  | 2   | 0  | 0  | 0.648     | 0.000143  | 0.2       |
| 14   | BRIX1    | 363547  | 3    | 3    | 3     | 0    | 0  | 1  | 1  | 1   | 0  | 0  | 0.411     | 0.000191  | 0.234     |
| 15   | SAMD1    | 179676  | 2    | 2    | 2     | 0    | 1  | 0  | 1  | 0   | 0  | 0  | 0.451     | 0.000206  | 0.234     |
| 16   | EFCAB1   | 259309  | 2    | 2    | 2     | 0    | 1  | 0  | 0  | 0   | 1  | 0  | 0.73      | 0.000213  | 0.234     |
| 17   | C11orf87 | 235800  | 3    | 3    | 3     | 0    | 2  | 0  | 0  | 1   | 0  | 0  | 0.301     | 0.000228  | 0.234     |
| 18   | SLC25A45 | 358159  | 3    | 3    | 3     | 1    | 1  | 1  | 1  | 0   | 0  | 0  | 0.704     | 0.000233  | 0.234     |
| 19   | CD163    | 1408189 | 4    | 4    | 4     | 0    | 2  | 1  | 1  | 0   | 0  | 0  | 0.228     | 0.000319  | 0.299     |
| 20   | DNAH9    | 5334405 | 9    | 9    | 9     | 1    | 2  | 3  | 1  | 3   | 0  | 0  | 0.139     | 0.000335  | 0.299     |

**C**

**Summary of BRAF Variants**

| Alteration      | Protein change | # tumours | Size of cohort | % of cohort |
|-----------------|----------------|-----------|----------------|-------------|
| All             |                | 254       | 402            | 63.18%      |
| SSNV            | V600E          | 235       | 402            | 58.46%      |
| SSNV            | K601E          | 1         | 402            | 0.25%       |
| indels          |                | 3         | 402            | 0.75%       |
| fusions         |                | 13        | 482            | 2.70%       |
| focal deletions |                | 2         | 495            | 0.40%       |

**D**

**Summary of RAS Variants**

| Alteration | Protein change | # tumours | Size of cohort | % of cohort |
|------------|----------------|-----------|----------------|-------------|
| NRAS       | Q61R           | 34        | 402            | 8.46%       |
| All HRAS   |                | 14        | 402            | 3.48%       |
| HRAS       | Q61R           | 11        | 402            | 2.74%       |
| HRAS       | Q61K           | 3         | 402            | 0.75%       |
| All KRAS   |                | 4         | 402            | 1.00%       |
| KRAS       | Q61R           | 1         | 402            | 0.25%       |
| KRAS       | Q61K           | 1         | 402            | 0.25%       |
| KRAS       | G12V           | 1         | 402            | 0.25%       |
| KRAS       | Q61K           | 1         | 402            | 0.25%       |

**E**

|         | BRAF-mutant |         |            |          | RAS-mutant |         |            |          |
|---------|-------------|---------|------------|----------|------------|---------|------------|----------|
|         | # positive  | # total | % positive | p-value* | # positive | # total | % positive | p-value* |
| CT      | 191         | 239     | 79.92%     | 2.07E-08 | 20         | 49      | 40.82%     | 1.19E-05 |
| FV      | 17          | 239     | 7.11%      | 1.16E-17 | 29         | 49      | 59.18%     | 1.44E-09 |
| TCV     | 28          | 239     | 11.72%     | 1.23E-05 | 0          | 49      | 0.00%      | 2.19E-02 |
| OV      | 3           | 239     | 1.26%      | 6.80E-01 | 0          | 49      | 0.00%      | 1.00E+00 |
| Missing | 8           | 247     | 3.24%      | 0.432688 | 3          | 52      | 5.77%      | 0.446869 |

  

|             | CT         |         |            |          | FV         |         |            |          | TCV        |         |            |          |
|-------------|------------|---------|------------|----------|------------|---------|------------|----------|------------|---------|------------|----------|
|             | # positive | # total | % positive | p-value* | # positive | # total | % positive | p-value* | # positive | # total | % positive | p-value* |
| BRAF-mutant | 191        | 268     | 71.27%     | 2.07E-08 | 17         | 83      | 20.48%     | 1.16E-17 | 28         | 29      | 96.55%     | 1.23E-05 |
| RAS-mutant  | 20         | 268     | 7.46%      | 1.19E-05 | 29         | 83      | 34.94%     | 1.44E-09 | 0          | 29      | 0.00%      | 2.19E-02 |
