# Supplementary material
Source: PubMed Central journal article supplement (PMC4243044)
Supplement: NIHMS633017-supplement-18.pdf [file NIHMS633017-supplement-18.pdf]

**A**

Non-synonymous mutation density

| set    | ALL   | BRAF_V600E | not BRAF_V600E | Fusions | not Fusions | DNA repair | not DNA repair | PI3K pathway | not PI3K pathway | Chromatin remodelers | not Chromatin remodelers |
|--------|-------|------------|----------------|---------|-------------|------------|----------------|--------------|------------------|----------------------|--------------------------|
| Ns     | 402   | 235        | 167            | 60      | 333         | 32         | 370            | 110          | 292              | 79                   | 323                      |
| mean   | 0.406 | 0.418      | 0.389          | 0.369   | 0.416       | 0.541      | 0.392          | 0.503        | 0.366            | 0.571                | 0.363                    |
| median | 0.367 | 0.345      | 0.375          | 0.310   | 0.369       | 0.450      | 0.357          | 0.455        | 0.310            | 0.507                | 0.317                    |
| stdev  | 0.278 | 0.314      | 0.217          | 0.235   | 0.286       | 0.388      | 0.262          | 0.293        | 0.264            | 0.394                | 0.220                    |
| MAD    | 0.196 | 0.216      | 0.170          | 0.185   | 0.198       | 0.310      | 0.186          | 0.205        | 0.182            | 0.273                | 0.168                    |
| IQR    | 0.307 | 0.311      | 0.280          | 0.343   | 0.290       | 0.547      | 0.304          | 0.305        | 0.251            | 0.427                | 0.269                    |
| MIN    | 0     | 0          | 0              | 0.033   | 0           | 0          | 0              | 0.070        | 0                | 0.035                | 0                        |
| MAX    | 2.158 | 2.158      | 1.138          | 1.049   | 2.158       | 1.541      | 2.162          | 2.116        | 2.211            | 2.124                | 1.630                    |
| P      |       |            | 0.878          |         | 0.301       |            | 0.046          |              | 9.33E-08         |                      | 3.23E-07                 |

Non-synonymous Mutation density age-fit residuals

| set    | ALL age fit residual | BRAF_V600E age fit residual | not BRAF_V600E age fit residual | Fusions age fit residual | not Fusions age fit residual | DNA repair age fit residual | not DNA repair age fit residual | PI3K pathway age fit residual | not PI3K pathway age fit residual | Chromatin remodeler age fit residual | not Chromatin remodeler age fit residual |
|--------|----------------------|-----------------------------|---------------------------------|--------------------------|------------------------------|-----------------------------|---------------------------------|-------------------------------|-----------------------------------|--------------------------------------|------------------------------------------|
| Ns     | 402                  | 235                         | 167                             | 60                       | 333                          | 32                          | 370                             | 110                           | 292                               | 79                                   | 323                                      |
| mean   | 0.004                | 0.008                       | -0.001                          | 0.019                    | 0.002                        | 0.092                       | -0.002                          | 0.081                         | -0.024                            | 0.121                                | -0.024                                   |
| median | -0.024               | -0.034                      | -0.009                          | -0.007                   | -0.030                       | -0.053                      | -0.023                          | 0.018                         | -0.045                            | 0.034                                | -0.043                                   |
| stdev  | 0.240                | 0.261                       | 0.206                           | 0.212                    | 0.244                        | 0.333                       | 0.229                           | 0.285                         | 0.215                             | 0.322                                | 0.202                                    |
| MAD    | 0.169                | 0.178                       | 0.156                           | 0.153                    | 0.170                        | 0.266                       | 0.163                           | 0.199                         | 0.156                             | 0.224                                | 0.152                                    |
| IQR    | 0.260                | 0.266                       | 0.246                           | 0.218                    | 0.261                        | 0.422                       | 0.251                           | 0.308                         | 0.236                             | 0.309                                | 0.240                                    |
| MIN    | -0.486               | -0.423                      | -0.486                          | -0.337                   | -0.492                       | -0.275                      | -0.482                          | -0.368                        | -0.476                            | -0.388                               | -0.476                                   |
| MAX    | 1.687                | 1.687                       | 0.759                           | 0.758                    | 1.685                        | 1.009                       | 1.693                           | 1.706                         | 1.368                             | 1.687                                | 1.099                                    |
| P*     |                      |                             | 0.516                           |                          | 0.341                        |                             | 0.447                           |                               | 3.40E-04                          |                                      | 5.94E-05                                 |

**B**

| Gene Fusion   | # Tumours | Frequency | BRAF <sup>V600E</sup> -vs. RAS-like phenotype                                          |
|---------------|-----------|-----------|----------------------------------------------------------------------------------------|
| CCD6/RET      | 21        | 4.3%      | BRAF <sup>V600E</sup> -like (15), 6 un                                                 |
| NCOA4/RET     | 5         | 1.0%      | BRAF <sup>V600E</sup> -like (4), 1 un                                                  |
| ERCC1/RET     | 2         | 0.4%      | BRAF <sup>V600E</sup> -like, all                                                       |
| APAK3/RET     | 1         | 0.2%      | BRAF <sup>V600E</sup> -like                                                            |
| FRS3/RET      | 1         | 0.2%      | RAS-like                                                                               |
| SPECC1/RET    | 1         | 0.2%      | BRAF <sup>V600E</sup> -like                                                            |
| TBL1XR1/RET   | 1         | 0.2%      | un                                                                                     |
| TRIM27/RET    | 1         | 0.2%      | un                                                                                     |
| RET, total    | 33        | 6.8%      | BRAF <sup>V600E</sup> -like (23), RAS-like (1), un (9)                                 |
| SNL1/BRAF     | 3         | 0.6%      | BRAF <sup>V600E</sup> -like (1), un (2)                                                |
| AGV/BRAF      | 1         | 0.2%      | BRAF <sup>V600E</sup> -like                                                            |
| AP3B1/BRAF    | 1         | 0.2%      | BRAF <sup>V600E</sup> -like                                                            |
| BLCL11/BRAF   | 1         | 0.2%      | un                                                                                     |
| CCNY/BRAF     | 1         | 0.2%      | BRAF <sup>V600E</sup> -like                                                            |
| ERCC1/BRAF    | 1         | 0.2%      | BRAF <sup>V600E</sup> -like                                                            |
| FAM114A2/BRAF | 1         | 0.2%      | BRAF <sup>V600E</sup> -like                                                            |
| MACF1/BRAF    | 1         | 0.2%      | BRAF <sup>V600E</sup> -like                                                            |
| MKRN1/BRAF    | 1         | 0.2%      | BRAF <sup>V600E</sup> -like                                                            |
| SVOP1/BRAF    | 1         | 0.2%      | un                                                                                     |
| ZCHAV1/BRAF   | 1         | 0.2%      | un                                                                                     |
| BRAF, total   | 13        | 2.7%      | BRAF <sup>V600E</sup> -like (8), un (5)                                                |
| ETV6/NTRK3    | 5         | 1.0%      | BRAF <sup>V600E</sup> -like (3), RAS-like (1), un (1)                                  |
| RBPMS/NTRK3   | 1         | 0.2%      | RAS-like                                                                               |
| NTRK3, total  | 6         | 1.2%      | BRAF <sup>V600E</sup> -like (3), RAS-like (2), un (1)                                  |
| RPS2P3/THADA  | 2         | 0.4%      | RAS-like, all                                                                          |
| IGF2BP3/THADA | 2         | 0.4%      | RAS-like, all                                                                          |
| FUJ06A1/THADA | 1         | 0.2%      | RAS-like                                                                               |
| TG/THADA      | 1         | 0.2%      | RAS-like                                                                               |
| THADA, total  | 6         | 1.2%      | RAS-like, all                                                                          |
| PAX8/PPARG    | 4         | 0.8%      | RAS-like, all                                                                          |
| IRF5BP2/NTRK1 | 1         | 0.2%      | BRAF <sup>V600E</sup> -like                                                            |
| SOSTM1/NTRK1  | 1         | 0.2%      | BRAF <sup>V600E</sup> -like                                                            |
| SSBP2/NTRK1   | 1         | 0.2%      | RAS-like                                                                               |
| TFG/NTRK1     | 1         | 0.2%      | BRAF <sup>V600E</sup> -like                                                            |
| NTRK1, total  | 4         | 0.8%      | BRAF <sup>V600E</sup> -like (3), RAS-like (1)                                          |
| EM/ALK        | 1         | 0.2%      | un                                                                                     |
| GTZ/ROD1/ALK  | 1         | 0.2%      | BRAF <sup>V600E</sup> -like                                                            |
| MALAT1/ALK    | 1         | 0.2%      | BRAF <sup>V600E</sup> -like                                                            |
| STRN/ALK      | 1         | 0.2%      | RAS-like                                                                               |
| ALK, total    | 4         | 0.8%      | BRAF <sup>V600E</sup> -like (2), RAS-like (1), un (1)                                  |
| DFD1/FGFR2    | 1         | 0.2%      | RAS-like                                                                               |
| VCL/FGFR2     | 1         | 0.2%      | RAS-like                                                                               |
| FGFR2, total  | 2         | 0.4%      | RAS-like, all                                                                          |
| TFG/MET       | 1         | 0.2%      | BRAF <sup>V600E</sup> -like                                                            |
| UACA/TK       | 1         | 0.2%      | BRAF <sup>V600E</sup> -like                                                            |
| Total         | 74        | 15.3%     | BRAF <sup>V600E</sup> -like (41, 55.4%)<br>RAS-like (18, 24.3%)<br>unknown (15, 20.3%) |

**C**

| SUBNETWORK                                                                                                                                                                                                                                                                                                                                                                                                                                                                                                                                                                                                                                                                                                                             | KEGG PATHWAYS ENRICHMENTS |         | PROTEIN COMPLEXES (PINdb) ENRICHMENTS |         |
|----------------------------------------------------------------------------------------------------------------------------------------------------------------------------------------------------------------------------------------------------------------------------------------------------------------------------------------------------------------------------------------------------------------------------------------------------------------------------------------------------------------------------------------------------------------------------------------------------------------------------------------------------------------------------------------------------------------------------------------|---------------------------|---------|---------------------------------------|---------|
|                                                                                                                                                                                                                                                                                                                                                                                                                                                                                                                                                                                                                                                                                                                                        | Name                      | p-value | Name                                  | p-value |
| ADAMTS2(3) AMBP(1) BRAF(250) CDC8B(4) HRAS(14) FTH1(1) KRAS(5) MAP3K1(2) NRAS(4) PRKCA(2) PRKCE(1) PRKCG(1) PRKSI(5) RAPIGAP(1) RGL1(1) RGL2(1) CACHD2(2) CNTNAP4(1) GSP1(2) KIAA2012(2) MAP3K1(3) NRXN1(4) NRXN2(1) RIZ2(2) RANBP1(1) SIPA1L1(1) SYT1(1) THSD7B(1) ZMIZ2(2) COL1A2(1) COL3A1(3) COL5A3(5) LPL(1) LRP1(5) LRPA1(2) RBLN1(1) SORL1(1) THBS1(1) VEGFA(1) CBRPA(1) F10(2) FR(1) F9(1) HIST1H1C(1) MAP3K3(2) PROCG(1) PRSS1(2) VWF(2) ACVR2A(1) ACVR2B(1) BTBD9(1) CHL9(1) DSCAML1(1) INHBA(1) MAGI2(1) MAGI3(1) PLXNC4(2) APOB(5) CALR(1) CASK(1) CD3E(1) CD3E(1) CTRP2(2) HSP90B1(1) MTPP(2) ATM(5) ATR(3) BRCA2(3) CHEK2(5) FANCD2(3) FANCF(1) FANCG(2) FANCM(1) p53 signaling 0.02 FANCA core; FANCA-associated Rct10* |                           |         |                                       |         |
| EXPH5(1) MYO5A(1) RAB27A(2) SYTL3(2) SYTL4(2) SYTL5(1) FLT4(1) KDR(2) NRP1(3) SEMA3A(1) SH2D2A(1) VEGFA(1) ABCA1(1) DLG2(1) GRIN2A(1) GRIN2B(3) PTK2B(2) ADAM15(2) LGALS13(1) PACSIN3(1) SNX9(1) SPM(3) AKAP12(1) DBN1(2) EED(2) EZH1(2) PHF1(1) ANK1(3) CD44(1) ODCN(5) SPTA1(6) SPTB(1) APAF1(2) CASP8(1) NLRC4(2) NLRP1(2) NOD1(2) CPE(2) POLR1A(1) POLR1B(2) ROBO2(2) TRIM13(1) FGA(1) GANAB(2) MAN1C(1) PRKCSH(1) PRKCA(4) PDSSA(1) PDS5B(1) SMC4(1) STAG1(1) STAG2(1) SNF2h/cohesin 5x10*                                                                                                                                                                                                                                        |                           |         |                                       |         |
| ADAMTS2(3) AMBP(1) BRAF(250) CDC8B(4) HRAS(14) FTH1(1) KRAS(5) MAP3K1(2) NRAS(4) PRKCA(2) PRKCE(1) PRKCG(1) PRKSI(5) RAPIGAP(1) RGL1(1) RGL2(1) CACHD2(2) CNTNAP4(1) GSP1(2) KIAA2012(2) MAP3K1(3) NRXN1(4) NRXN2(1) RIZ2(2) RANBP1(1) SIPA1L1(1) SYT1(1) THSD7B(1) ZMIZ2(2) COL1A2(1) COL3A1(3) COL5A3(5) LPL(1) LRP1(5) LRPA1(2) RBLN1(1) SORL1(1) THBS1(1) VEGFA(1) CBRPA(1) F10(2) FR(1) F9(1) HIST1H1C(1) MAP3K3(2) PROCG(1) PRSS1(2) VWF(2) ACVR2A(1) ACVR2B(1) BTBD9(1) CHL9(1) DSCAML1(1) INHBA(1) MAGI2(1) MAGI3(1) PLXNC4(2) APOB(5) CALR(1) CASK(1) CD3E(1) CD3E(1) CTRP2(2) HSP90B1(1) MTPP(2) ATM(5) ATR(3) BRCA2(3) CHEK2(5) FANCD2(3) FANCF(1) FANCG(2) FANCM(1) p53 signaling 0.02 FANCA core; FANCA-associated Rct10* |                           |         |                                       |         |
| EXPH5(1) MYO5A(1) RAB27A(2) SYTL3(2) SYTL4(2) SYTL5(1) FLT4(1) KDR(2) NRP1(3) SEMA3A(1) SH2D2A(1) VEGFA(1) ABCA1(1) DLG2(1) GRIN2A(1) GRIN2B(3) PTK2B(2) ADAM15(2) LGALS13(1) PACSIN3(1) SNX9(1) SPM(3) AKAP12(1) DBN1(2) EED(2) EZH1(2) PHF1(1) ANK1(3) CD44(1) ODCN(5) SPTA1(6) SPTB(1) APAF1(2) CASP8(1) NLRC4(2) NLRP1(2) NOD1(2) CPE(2) POLR1A(1) POLR1B(2) ROBO2(2) TRIM13(1) FGA(1) GANAB(2) MAN1C(1) PRKCSH(1) PRKCA(4) PDSSA(1) PDS5B(1) SMC4(1) STAG1(1) STAG2(1) SNF2h/cohesin 5x10*                                                                                                                                                                                                                                        |                           |         |                                       |         |

**D**

| Gene symbol | Entrez gene ID | Subtype mutations | Total mutations | HG P-value (uncorrected) |
|-------------|----------------|-------------------|-----------------|--------------------------|
| CHEK2       | 11200          | 4                 | 5               | 2.31E-02                 |
| HRAS        | 3265           | 13                | 13              | 3.70E-08                 |
| NRAS        | 4893           | 33                | 33              | 0.00E+00                 |
| NTRK1       | 4914           | 4                 | 4               | 5.90E-03                 |
| PAX8        | 7849           | 4                 | 4               | 5.90E-03                 |
| PPARG       | 5468           | 4                 | 5               | 2.31E-02                 |
| TG          | 7038           | 10                | 13              | 2.73E-04                 |
| CCDC6       | 8030           | 14                | 14              | 1.33E-15                 |
| NCOA4       | 8031           | 4                 | 4               | 9.10E-05                 |
| NTRK3       | 4916           | 5                 | 5               | 8.34E-06                 |
| RET         | 5979           | 22                | 22              | 6.66E-16                 |
| BRAF        | 673            | 229               | 232             | 4.44E-16                 |
| CACNA1E     | 777            | 4                 | 5               | 3.69E-01                 |
| CD163       | 9332           | 4                 | 4               | 1.45E-01                 |
| DNAH9       | 1770           | 6                 | 8               | 3.54E-01                 |
| EVPL        | 2125           | 4                 | 4               | 1.45E-01                 |
| GPX8        | 84059          | 4                 | 5               | 3.69E-01                 |
| TPR2        | 3709           | 4                 | 5               | 3.69E-01                 |
| MLL         | 4297           | 5                 | 7               | 4.60E-01                 |
| MLI3        | 58508          | 4                 | 4               | 1.45E-01                 |
| OBSCN       | 84033          | 5                 | 5               | 8.91E-02                 |
| OTUD4       | 54726          | 4                 | 5               | 3.69E-01                 |
| PCDHAC2     | 56134          | 5                 | 5               | 8.91E-02                 |
| PKHD1       | 5314           | 4                 | 4               | 1.45E-01                 |
| SHANK1      | 50944          | 4                 | 4               | 1.45E-01                 |
| SPTA1       | 6708           | 6                 | 6               | 5.47E-02                 |
| TRPM4       | 54795          | 4                 | 4               | 1.45E-01                 |
| USP9X       | 8239           | 4                 | 4               | 1.45E-01                 |
| ZHX3        | 463            | 7                 | 7               | 3.35E-02                 |

**E**

| TUMOURS          | Age | Gender | Histological type | Risk         | IMACS | Purity | Mutation density, non-syn | Mutation density, non-driver | BRS    | TDS    | T stage | N stage | M stage | Cancer gene census gene mutations | Protein Change                                  | Somatic Rearrangements               |                                                                                                                                                                                                                                                                         |
|------------------|-----|--------|-------------------|--------------|-------|--------|---------------------------|------------------------------|--------|--------|---------|---------|---------|-----------------------------------|-------------------------------------------------|--------------------------------------|-------------------------------------------------------------------------------------------------------------------------------------------------------------------------------------------------------------------------------------------------------------------------|
| TCGA-BJ-A191-01A | 49  | FEMALE | Other specify     | Intermediate |       | 0.95   | 0.816                     | 0.544                        | 0.464  | -0.320 | T1b     | NO      | NO      |                                   |                                                 |                                      |                                                                                                                                                                                                                                                                         |
| TCGA-BJ-A28T-01A | 34  | FEMALE | Classical/usual   | Intermediate |       | 0.11   | 0.100                     | 0.100                        | -0.107 | 1.588  | T1      | N1a     | NO      | ATM                               | ATM:p.L2452P:3                                  |                                      |                                                                                                                                                                                                                                                                         |
| TCGA-DI-A13R-01A | 50  | MALE   | Follicular        | Low          |       | 5.5    | 0.56                      | 0.701                        | 0.501  | 0.448  | 0.782   | T3      | NO      | NO                                |                                                 |                                      |                                                                                                                                                                                                                                                                         |
| TCGA-EB-A116-01A | 51  | FEMALE | Classical/usual   | Low          |       | 4.53   | 0.40                      | 0.000                        | 0.000  | 0.393  | 1.645   | T1b     | NO      | NO                                |                                                 |                                      |                                                                                                                                                                                                                                                                         |
| TCGA-EL-A3CX-01A | 22  | FEMALE | Classical/usual   | Low          |       | 4.09   | 1.00                      | 0.311                        | 0.276  | 0.169  | -0.084  | T2      | NO      | NO                                | APC                                             | APC:p.R213*16                        |                                                                                                                                                                                                                                                                         |
| TCGA-EL-A3H1-01A | 66  | FEMALE | Classical/usual   | Low          |       | 5.88   | 0.89                      | 1.076                        | 0.816  | 0.887  | 1.490   | T1      | NO      | NO                                | CHD4                                            | CHD4:p.V1492G:4                      |                                                                                                                                                                                                                                                                         |
| TCGA-EM-A1CW-01A | 39  | FEMALE | Follicular        | Intermediate |       | 4.45   | 0.50                      | 0.549                        | 0.377  | 0.863  | 1.576   | T3      | NO      | MX                                | NF1, KDM5A                                      | NF1:p.E244_Splice:19; KDM5A:p.K1162Q | translocation CYCS-WARS                                                                                                                                                                                                                                                 |
| TCGA-EM-A2CP-01A | 26  | FEMALE | Follicular        | Low          |       | 4.06   | 0.04                      | 0.236                        | 0.169  | 0.558  | 0.510   | T2      | NO      | MX                                |                                                 |                                      | Antisense fusion: NFE2L2/TFG; Protein fusion: out of frame PAX8/SLA; Protein fusion: out of frame CLCA1/RPP30; Protein fusion: in frame HERC4/CLCA1; tandem_dup TG Duplication of 12 exons: in frame; Antisense fusion NFE2L2/TFG; Protein fusion: in frame PAX8/NFE2L2 |
| TCGA-EM-A2OV-01A | 64  | FEMALE | Follicular        | Low          |       | 5.75   | 0.68                      | 0.904                        | 0.770  | 0.896  | 1.795   | T2      | NO      | MX                                | EZH1                                            | EZH1:p.Y642F:26                      |                                                                                                                                                                                                                                                                         |
| TCGA-EM-A3FL-01A | 63  | FEMALE | Follicular        | Low          |       | 5.49   | 0.48                      | 0.841                        | 0.538  | 0.931  | 1.949   | T1b     | NO      | MX                                | SPOP                                            | SPOP:p.P94R:45                       |                                                                                                                                                                                                                                                                         |
| TCGA-EM-A3FR-01A | 55  | FEMALE | Classical/usual   | Intermediate |       | 5.3    | 0.74                      | 0.837                        | 0.703  | 0.888  | 0.950   | T2      | N1a     | MX                                |                                                 |                                      |                                                                                                                                                                                                                                                                         |
| TCGA-ET-A3DV-01A | 68  | FEMALE | Follicular        | Intermediate |       | 7.7    | 1.00                      | 0.669                        | 0.401  | 0.874  | 1.183   | T3      | NO      | MX                                |                                                 |                                      |                                                                                                                                                                                                                                                                         |
| TCGA-FK-A3SD-01A | 61  | FEMALE | Classical/usual   | Low          |       | 0.80   | 1.171                     | 0.836                        | 0.990  | 1.806  | T1      | NO      | NO      | MLL, PDE4DIP, FBXO11              | MLL:p.K1574R:3; PDE4DIP:p.G2060K; FBXO11:p.Q72* |                                      |                                                                                                                                                                                                                                                                         |
| TCGA-FY-A2QD-01A | 61  | FEMALE | Classical/usual   | Low          |       | 6.68   | 0.90                      | 0.211                        | 0.141  | 0.908  | 1.798   | T1      | NO      | NO                                |                                                 |                                      | Protein fusion: in frame NF1X/GATAD2A                                                                                                                                                                                                                                   |

**F**

| Gene symbol | Gene full name | Brief function*                                                 |                                                                                                                                                                           |
|-------------|----------------|-----------------------------------------------------------------|---------------------------------------------------------------------------------------------------------------------------------------------------------------------------|
| 1           | DIO1           | deiodinase, iodothyronine, type I                               | activates thyroid hormone by converting the prohormone thyroxine (T4) by outer ring deiodination (ORD) to bioactive 3,3',5'-triiodothyronine (T3)                         |
| 2           | DIO2           | deiodinase, iodothyronine, type II                              | activates thyroid hormone by converting the prohormone thyroxine (T4) by outer ring deiodination (ORD) to bioactive 3,3',5'-triiodothyronine (T3)                         |
| 3           | DUOX1          | dual oxidase 1                                                  | involved in synthesis of thyroid hormone                                                                                                                                  |
| 4           | DUOX2          | dual oxidase 2                                                  | involved in synthesis of thyroid hormone                                                                                                                                  |
| 5           | FOXE1          | forkhead box E1                                                 | thyroid transcription factor which likely plays a crucial role in thyroid morphogenesis                                                                                   |
| 6           | GLI3           | GLI3 family zinc finger 3                                       | functions as both a repressor and activator of transcription and is specifically involved in the development of pancreatic beta cells, the thyroid, eye, liver and kidney |
| 7           | NKX2-1         | NK2 homeobox 1                                                  | thyroid-specific transcription factor that binds to the thyroglobulin promoter and regulates the expression of thyroid-specific genes                                     |
| 8           | PAX8           | paired box 8                                                    | transcription factor involved in thyroid follicular cell development and expression of thyroid-specific genes                                                             |
| 9           | SLC26A4        | solute carrier family 26 (anion exchanger), member 4            | iodide transmembrane transporter activity                                                                                                                                 |
| 10          | SLC5A5         | solute carrier family 5 (sodium/iodide cotransporter), member 5 | sodium:iodide symporter activity, responsible for the uptake of iodine in the thyroid                                                                                     |
