# Supplementary material
Source: PubMed Central journal article supplement (PMC4243044)

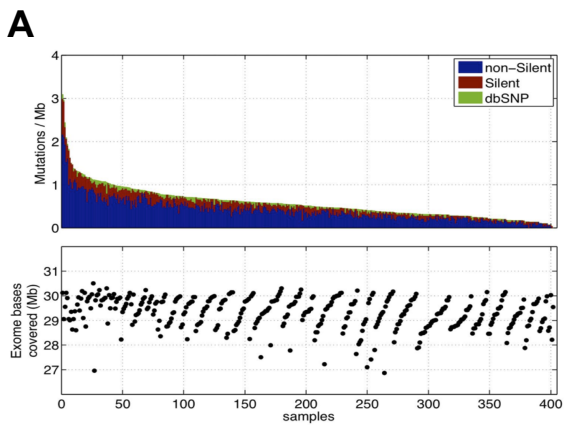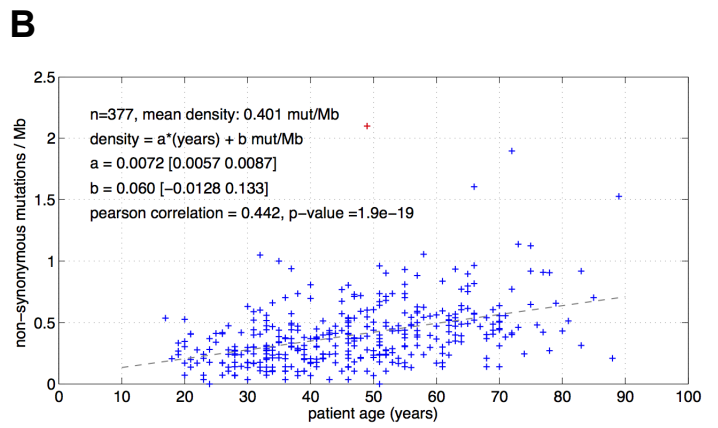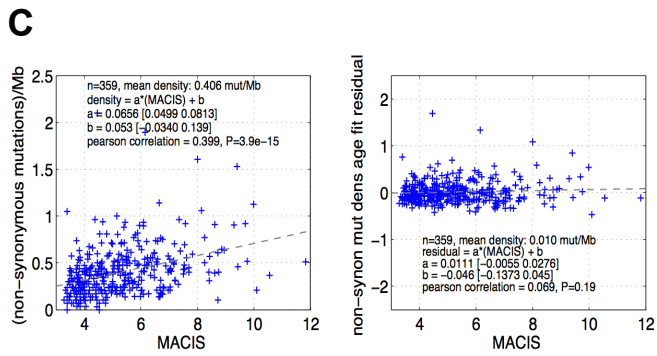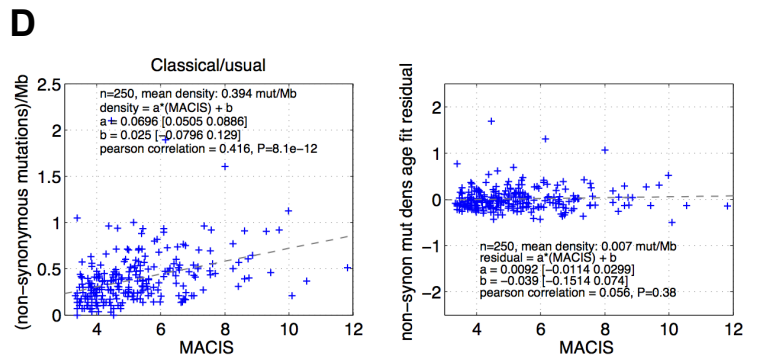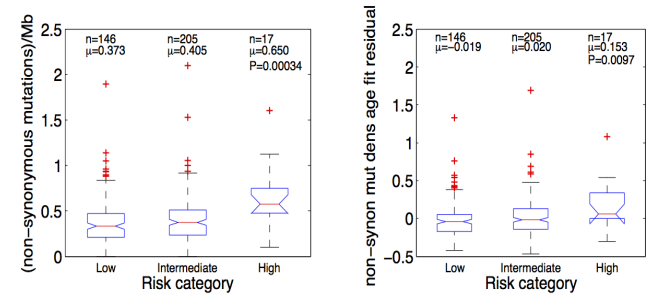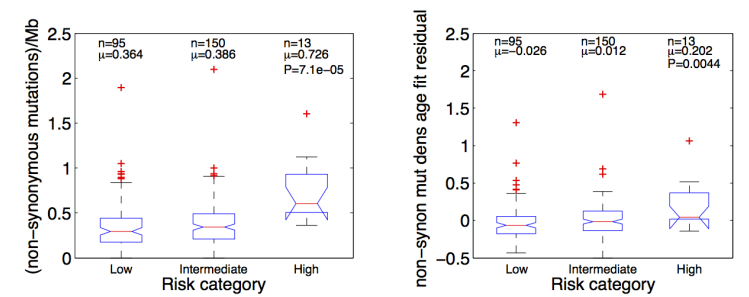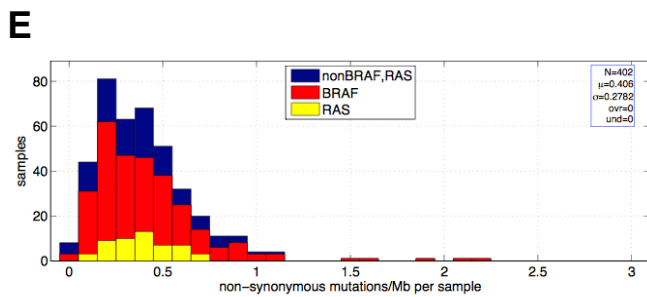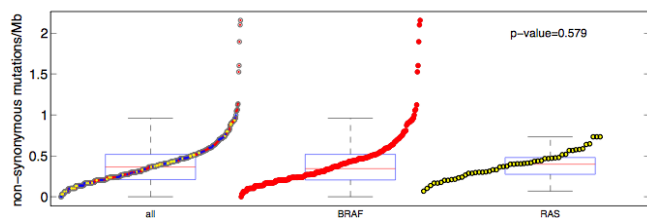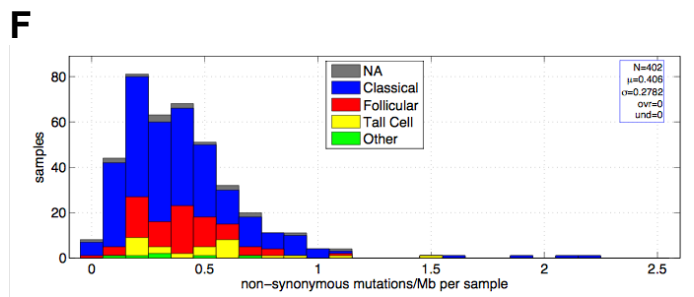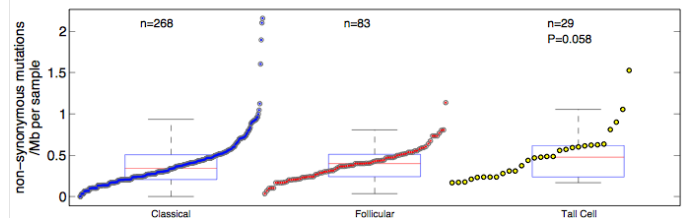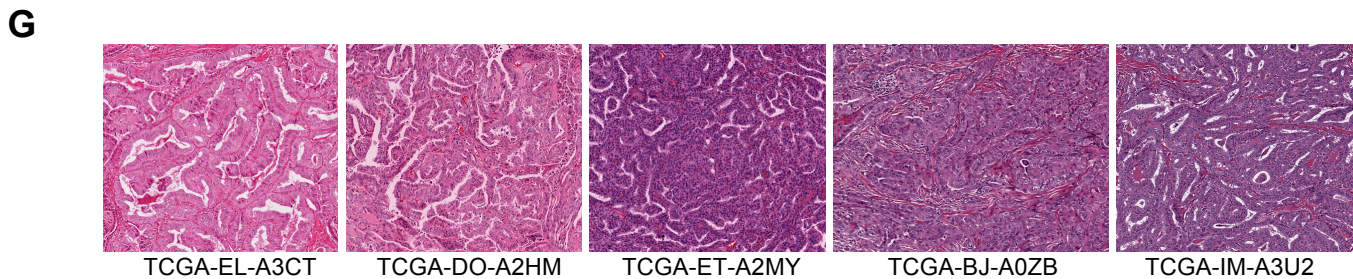

Supplement: NIHMS633017-supplement-1.pdf [file NIHMS633017-supplement-1.pdf]

**A**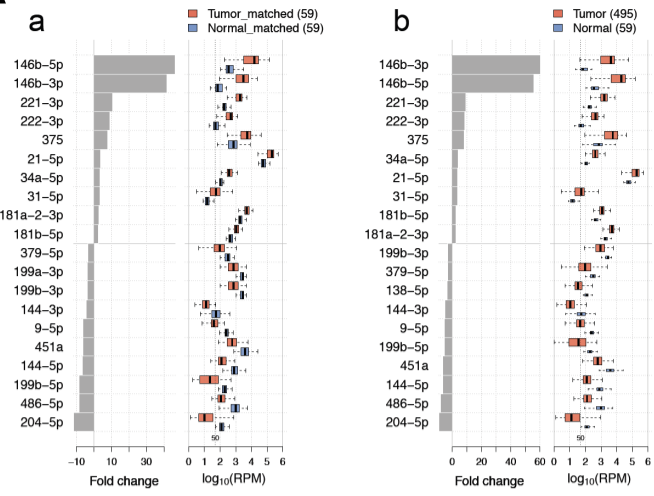**B**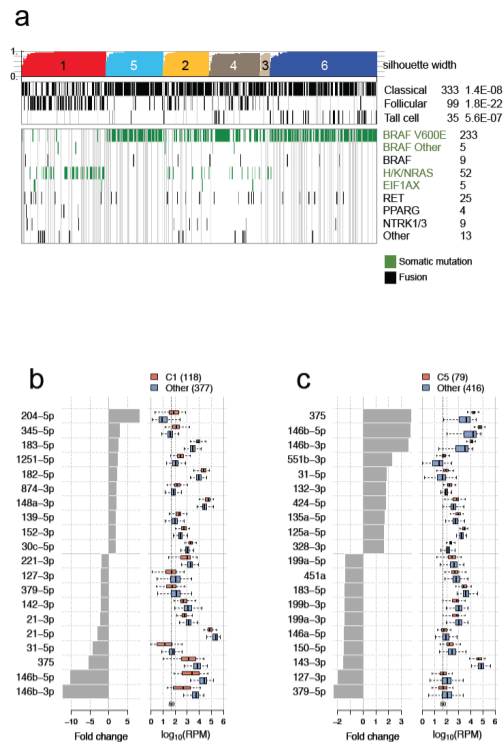**f**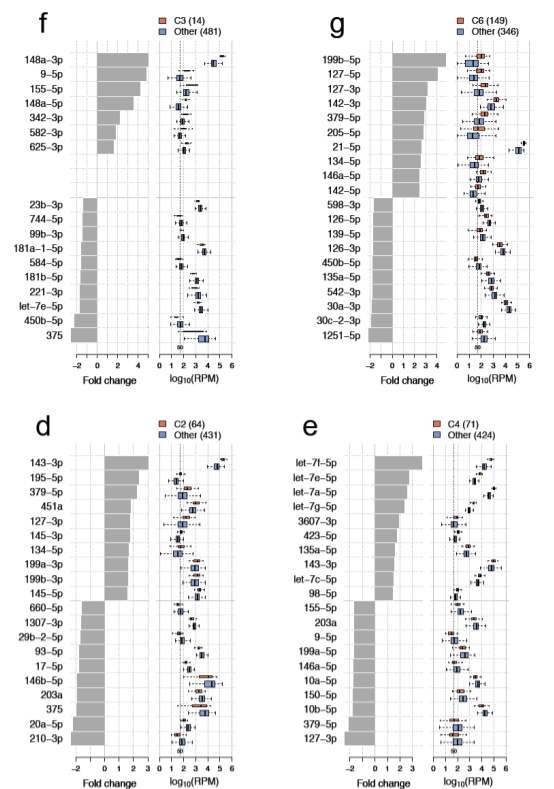**C**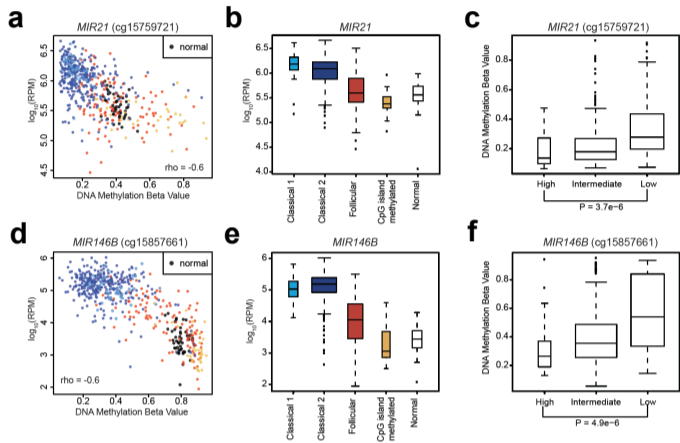**D**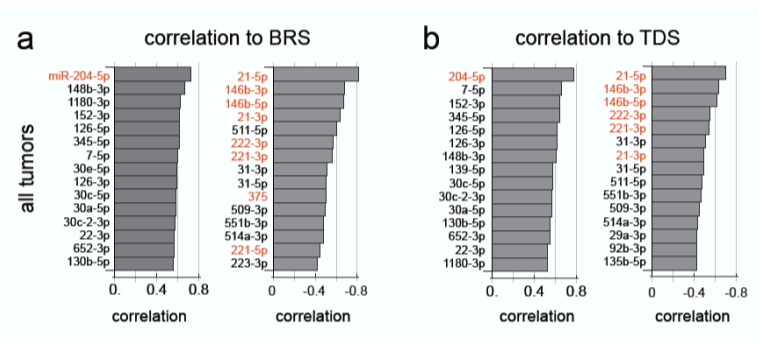**E**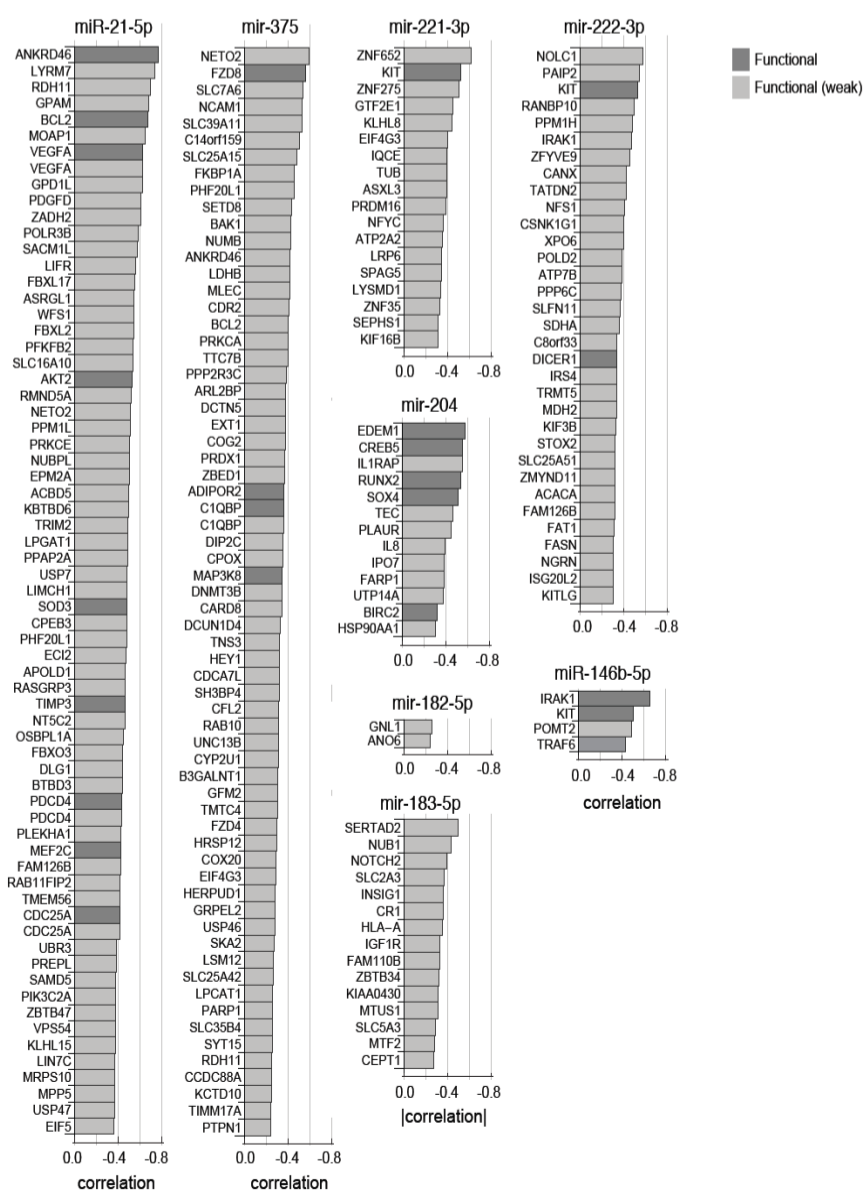**F**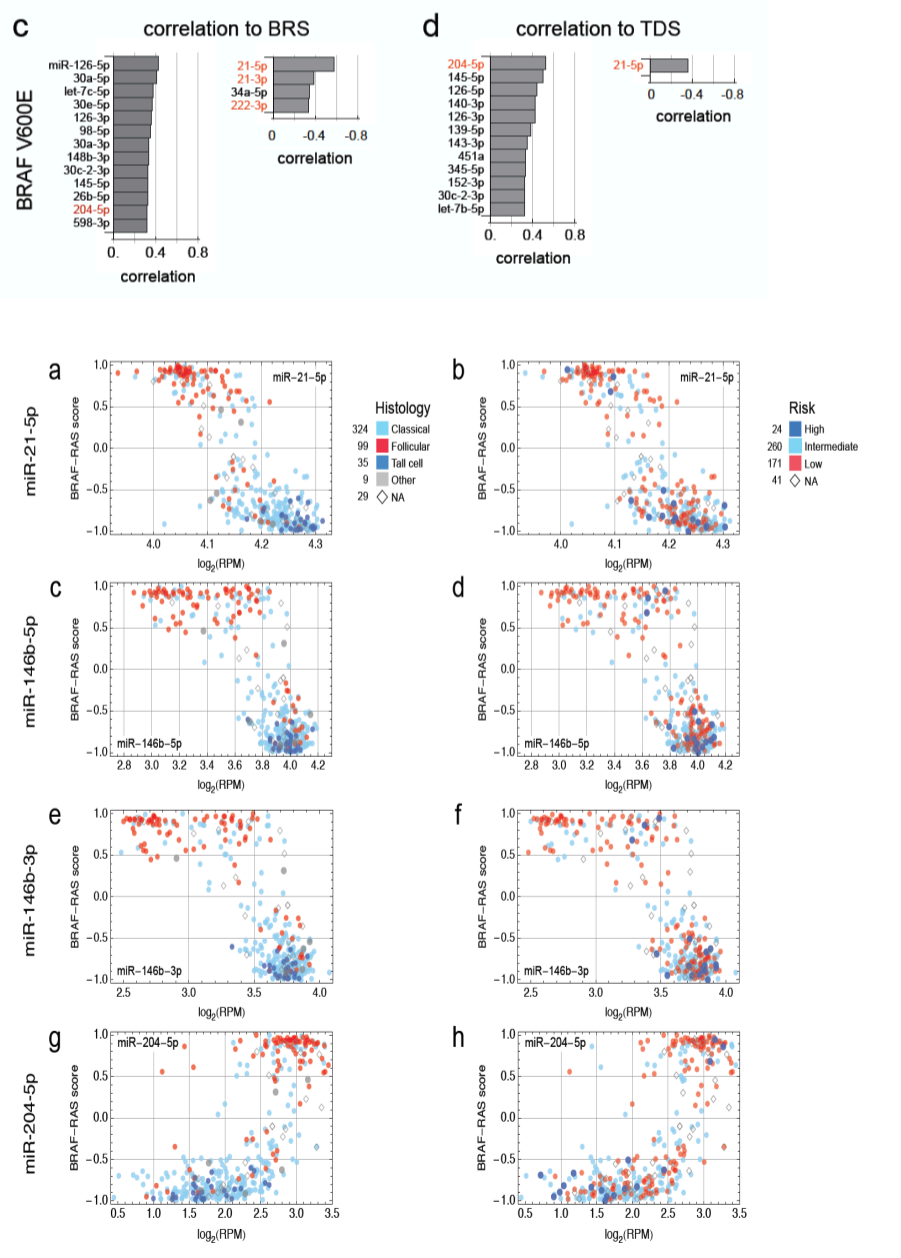

Supplement: NIHMS633017-supplement-10.pdf [file NIHMS633017-supplement-10.pdf]

# A BRAF

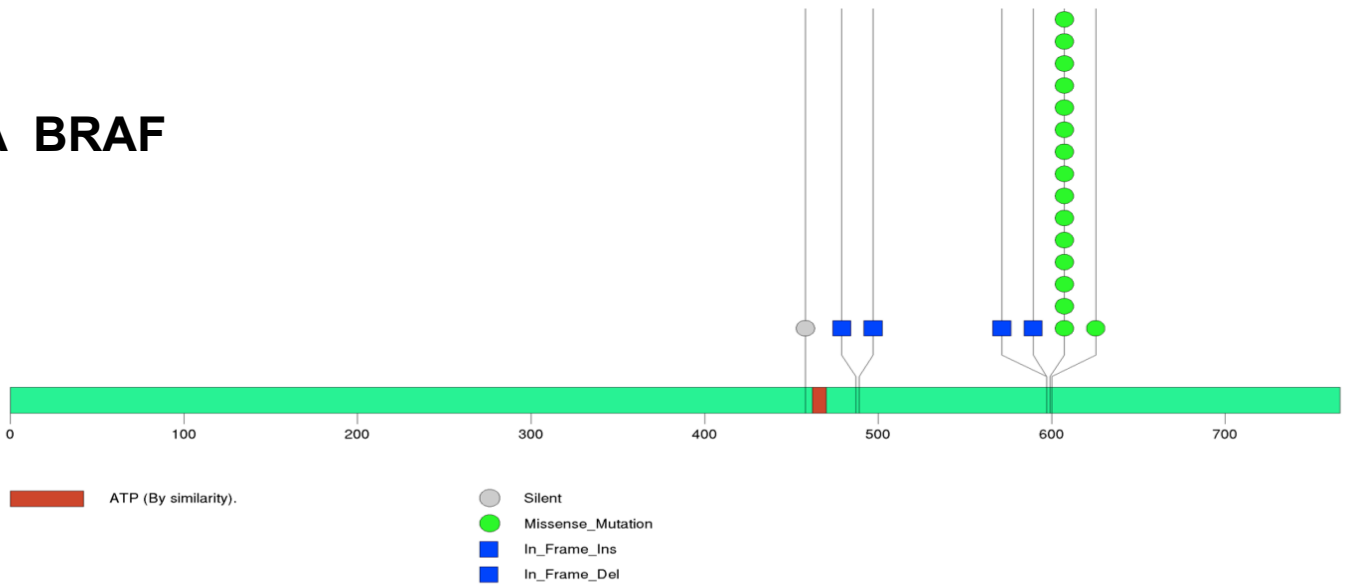

# B KRAS

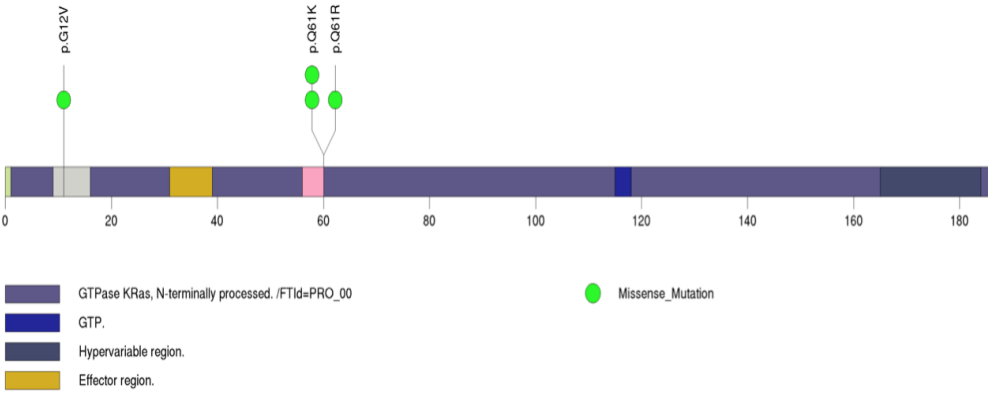

# C EIF1AX

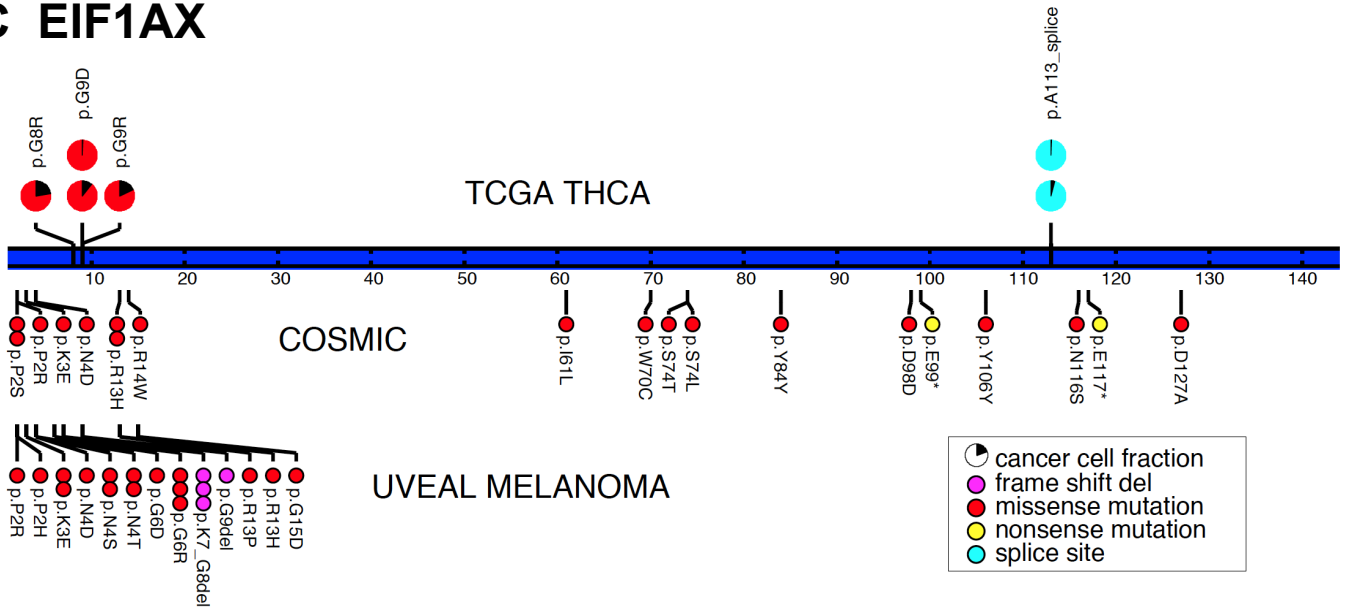

# D PPM1D

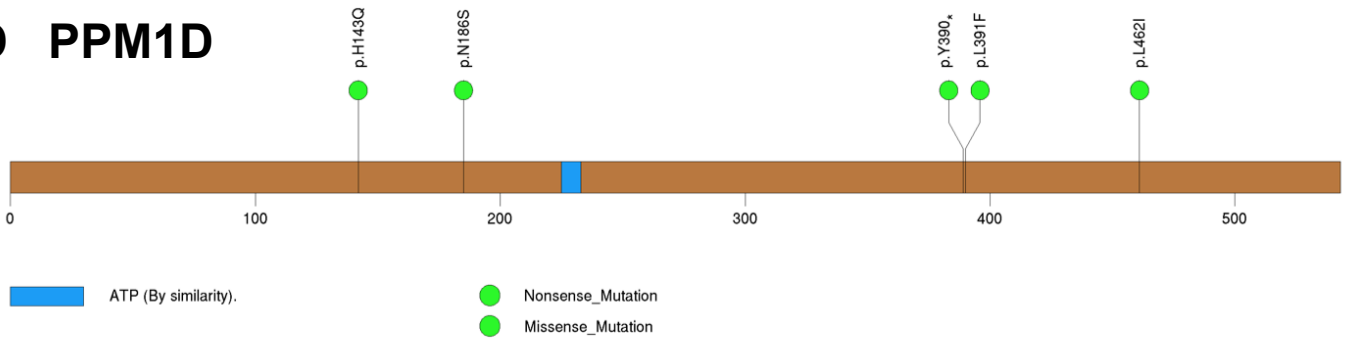

# E CHEK2

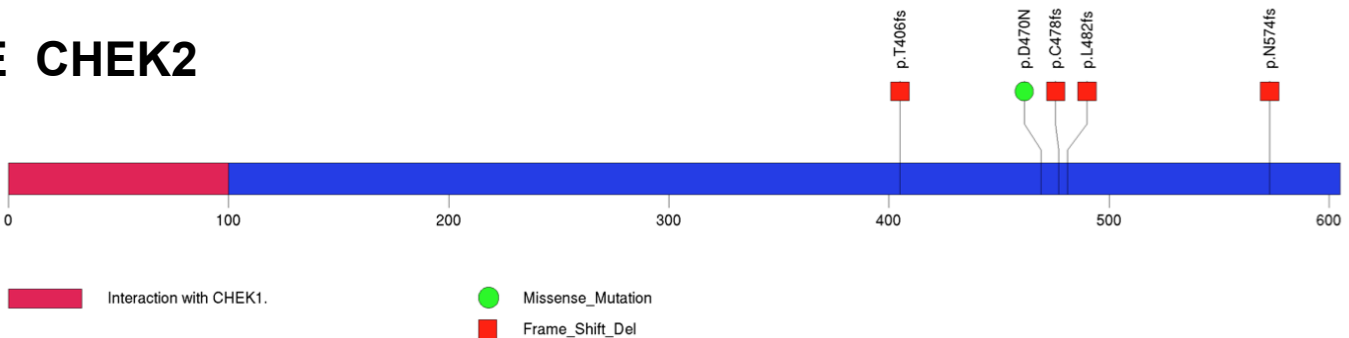

Supplement: NIHMS633017-supplement-2.pdf [file NIHMS633017-supplement-2.pdf]

**A**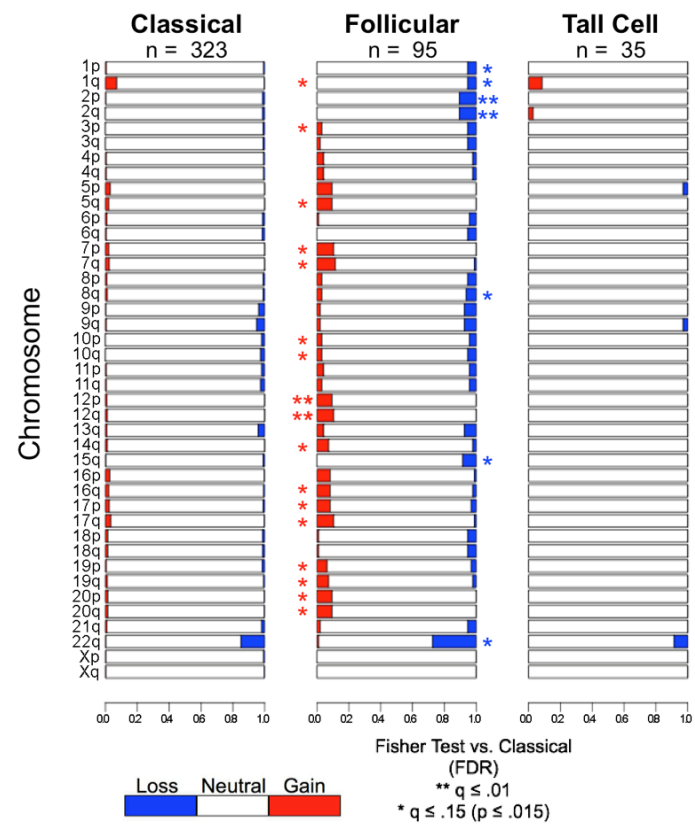**B**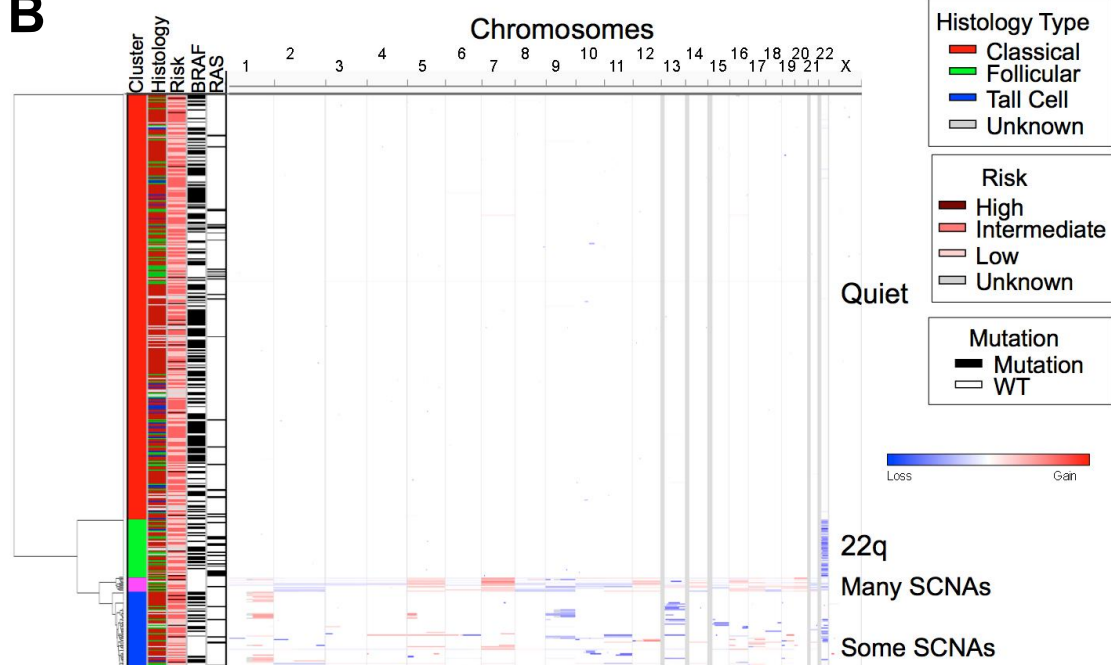**C**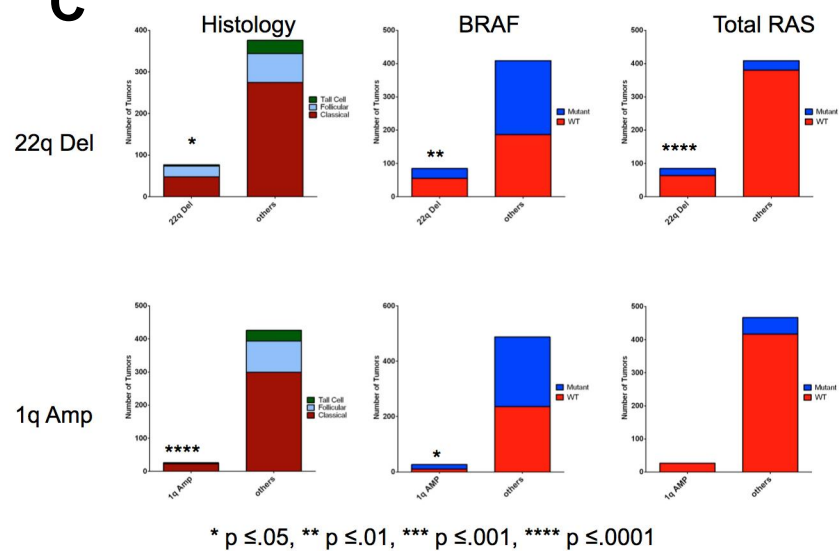**E**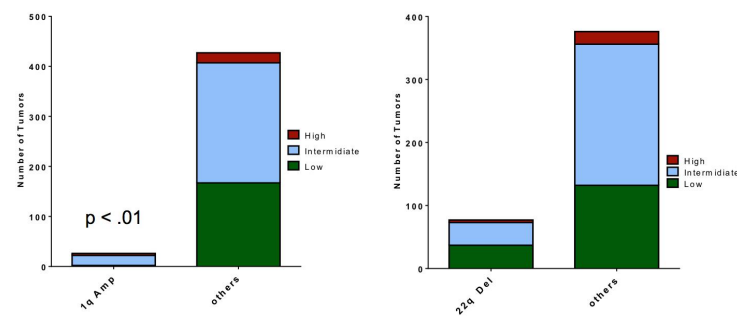**F**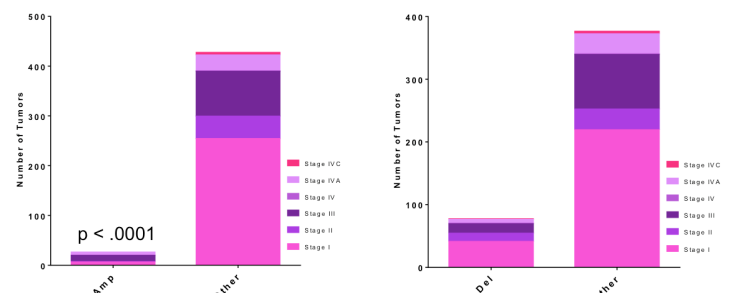**D**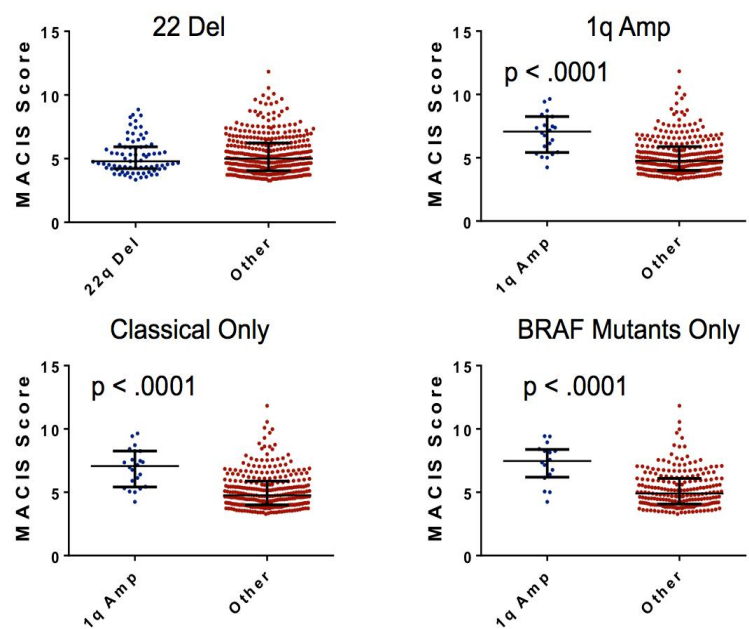**G**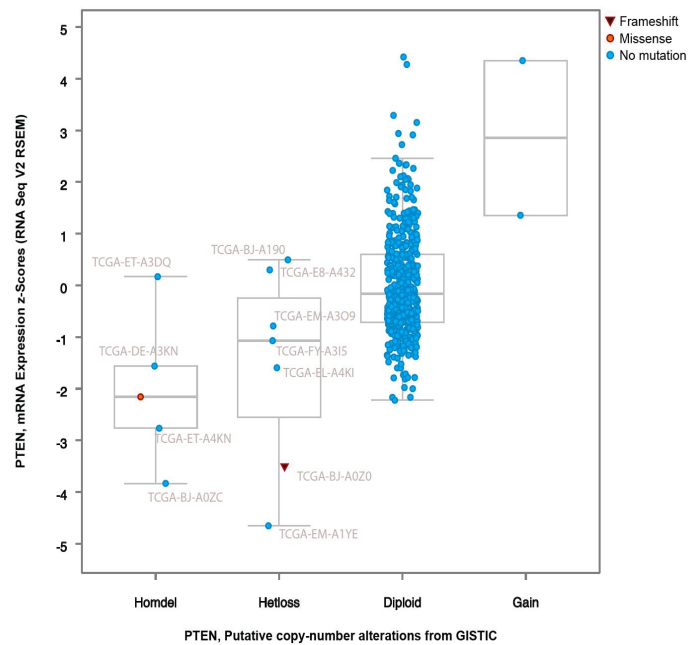

Supplement: NIHMS633017-supplement-4.pdf [file NIHMS633017-supplement-4.pdf]

**A**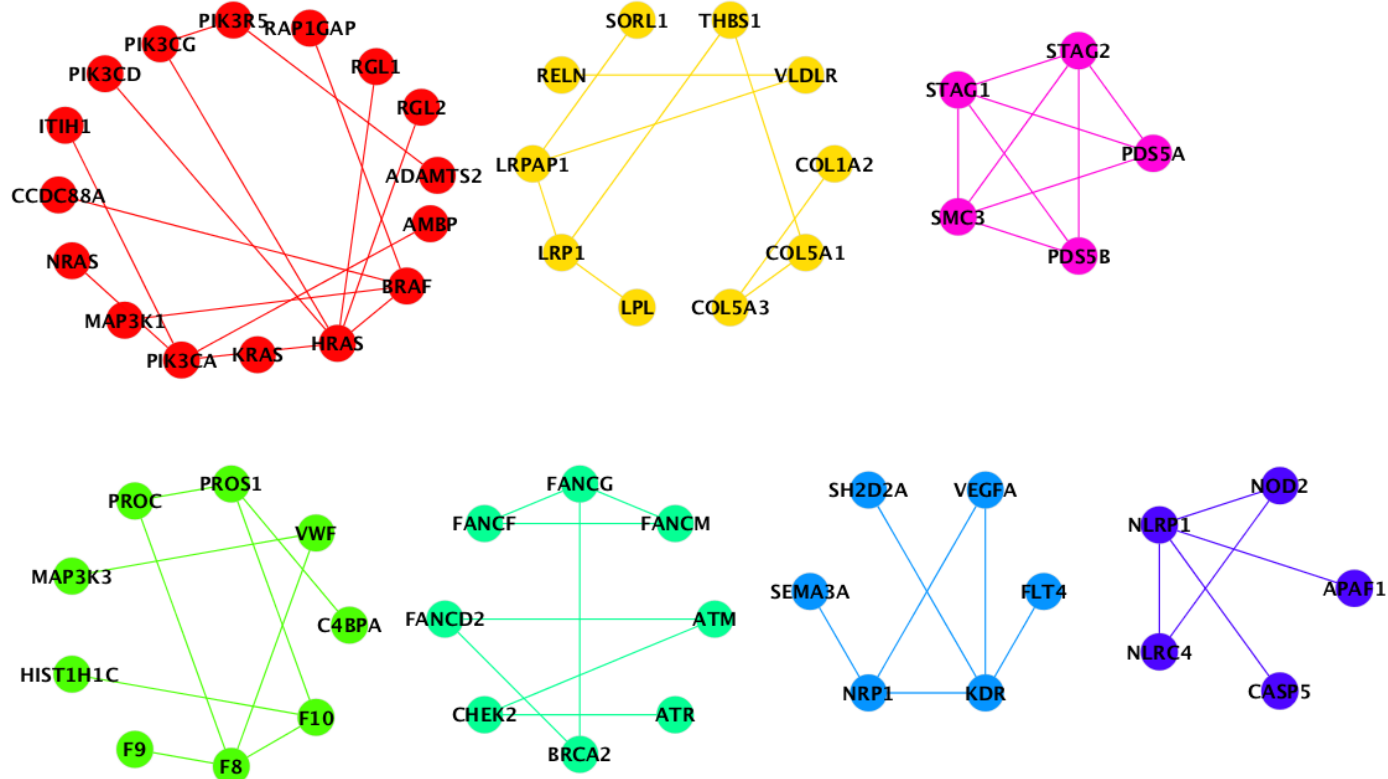**B**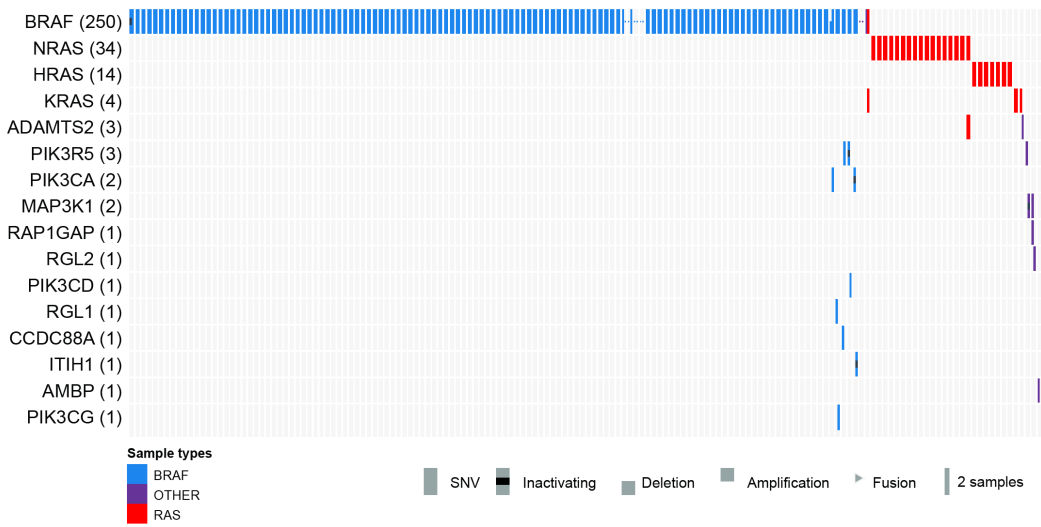**C**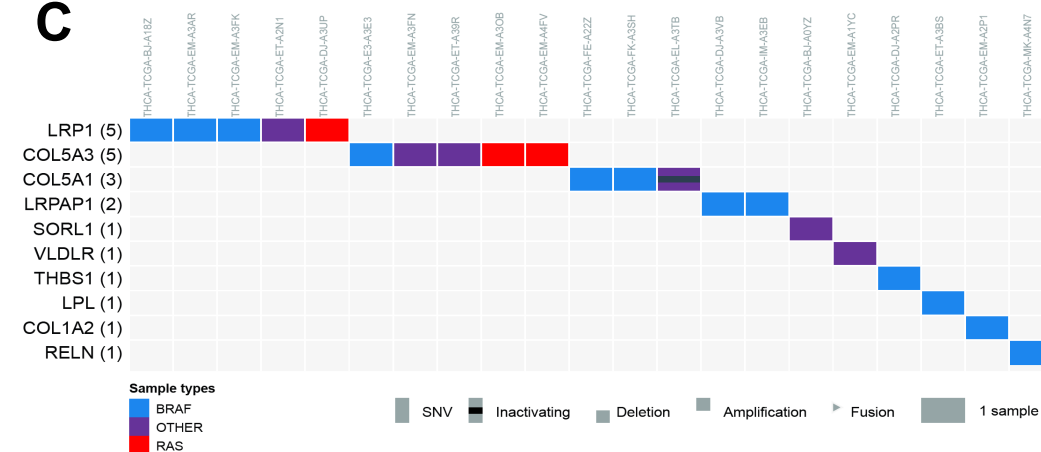**D**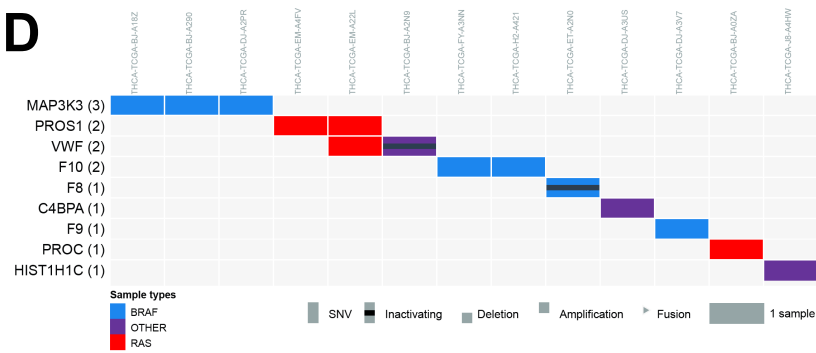**E**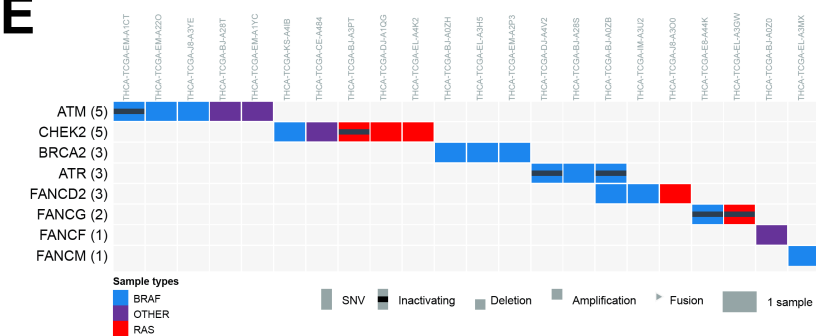

Supplement: NIHMS633017-supplement-5.pdf [file NIHMS633017-supplement-5.pdf]

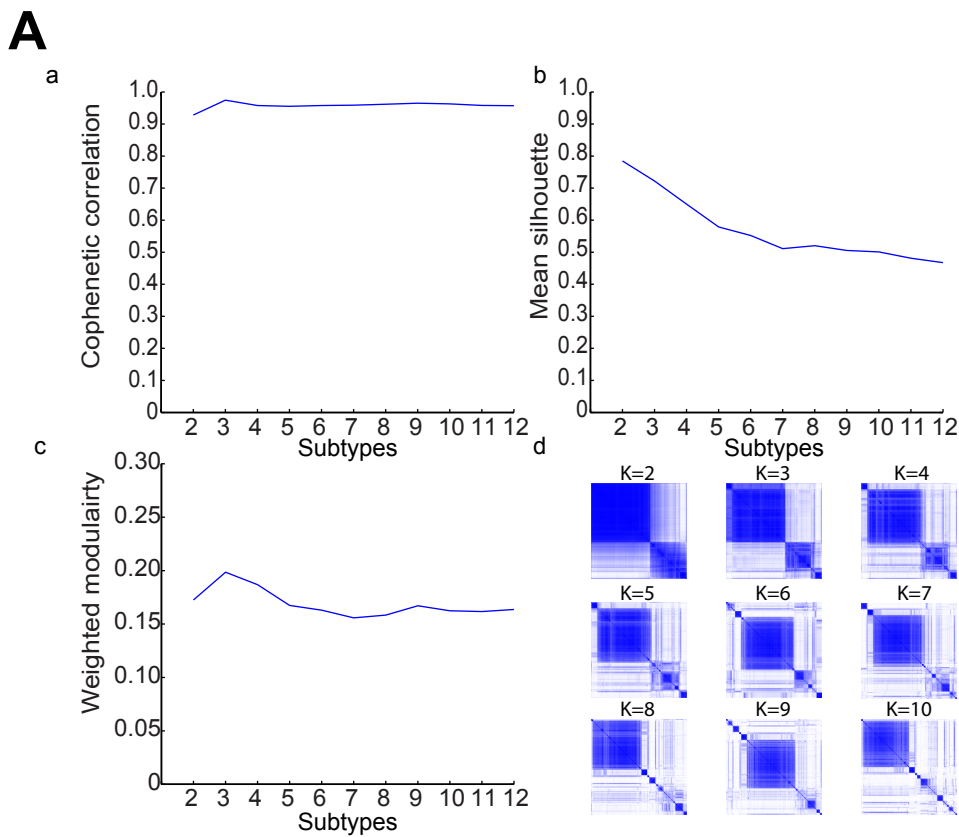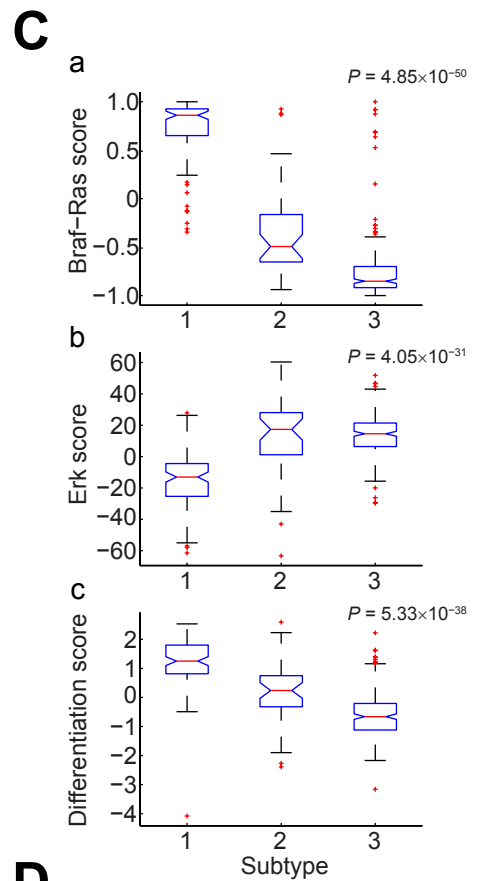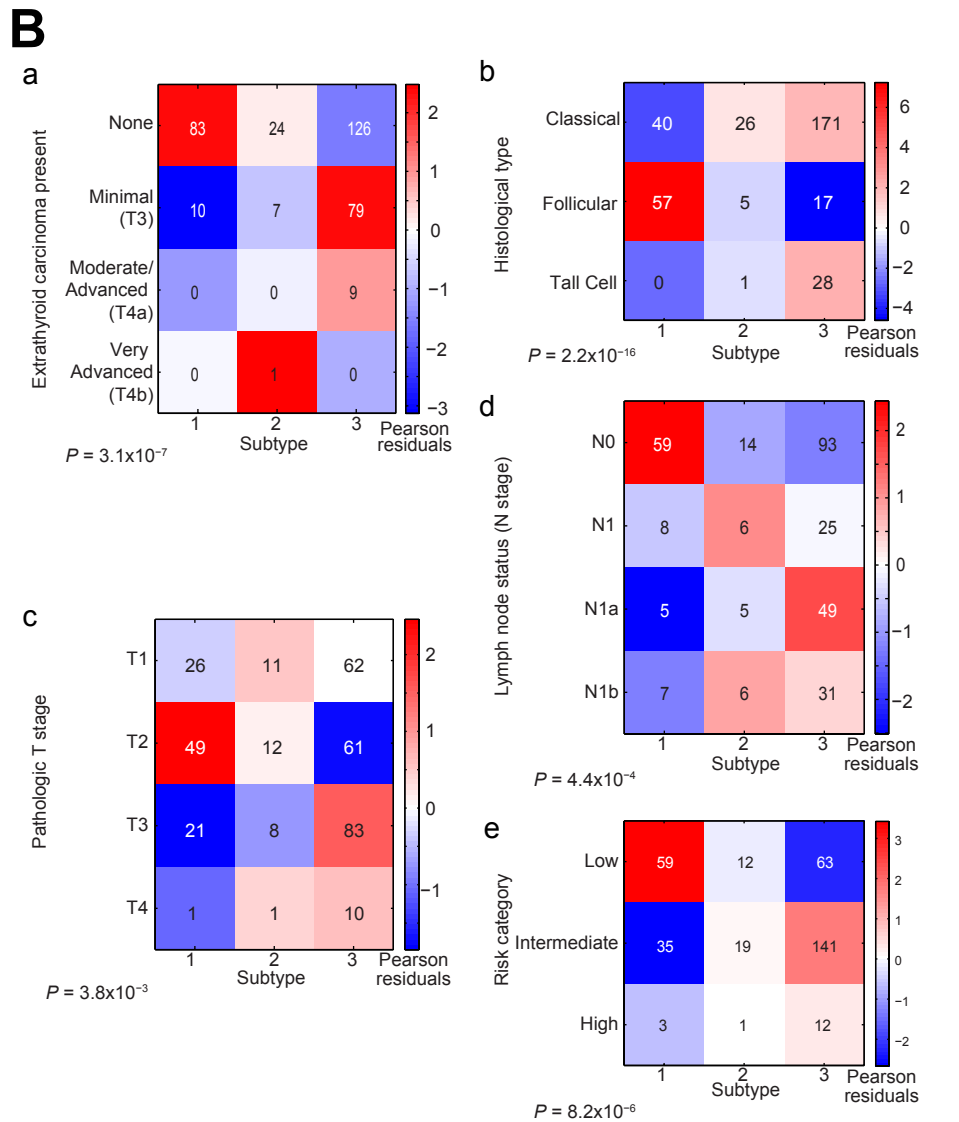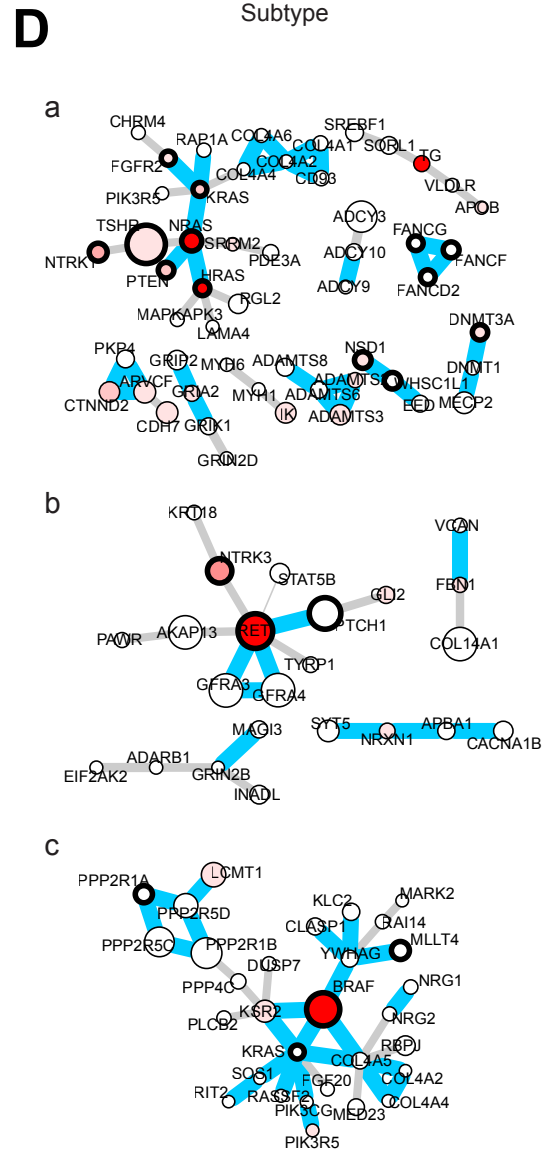

Supplement: NIHMS633017-supplement-6.pdf [file NIHMS633017-supplement-6.pdf]

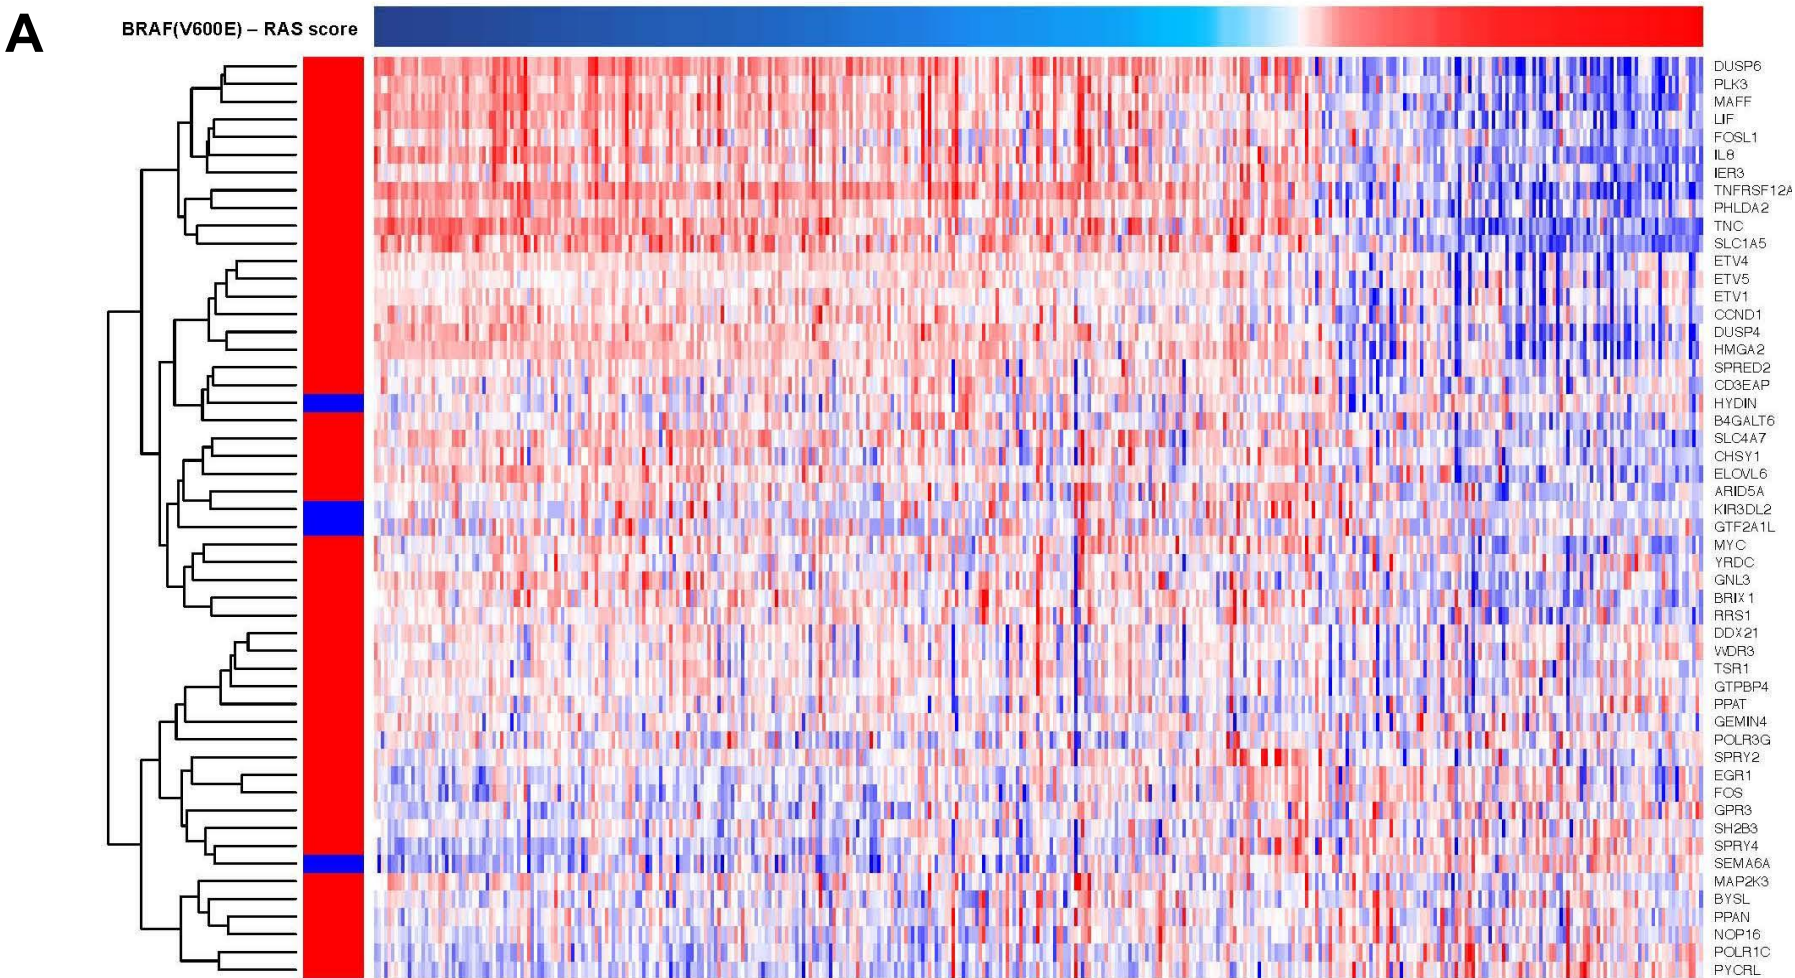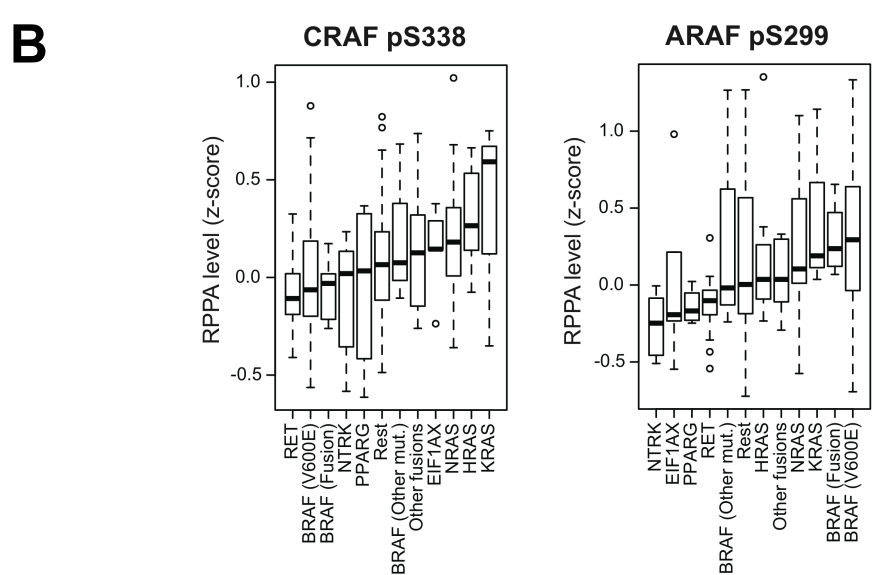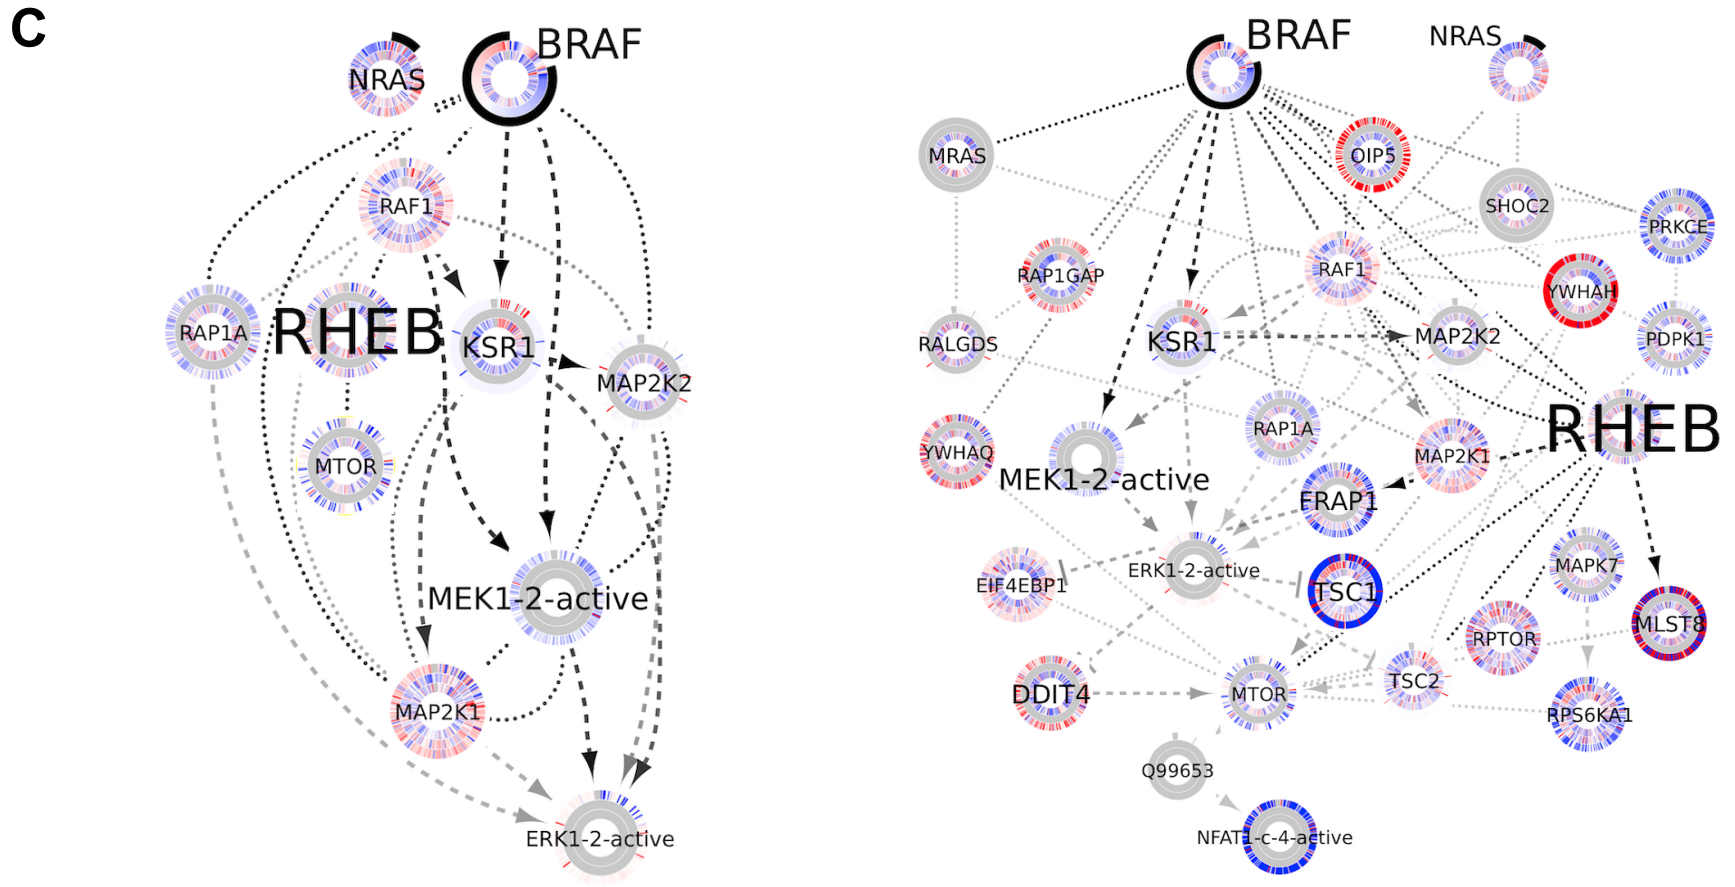

Supplement: NIHMS633017-supplement-8.pdf [file NIHMS633017-supplement-8.pdf]

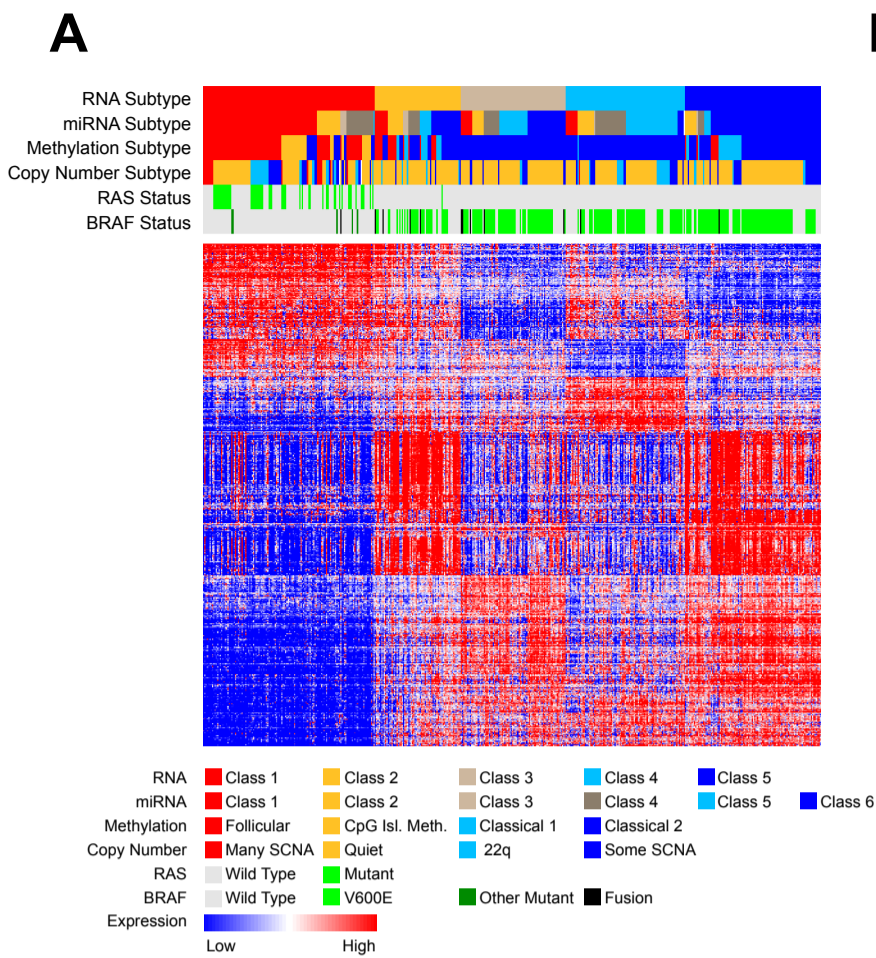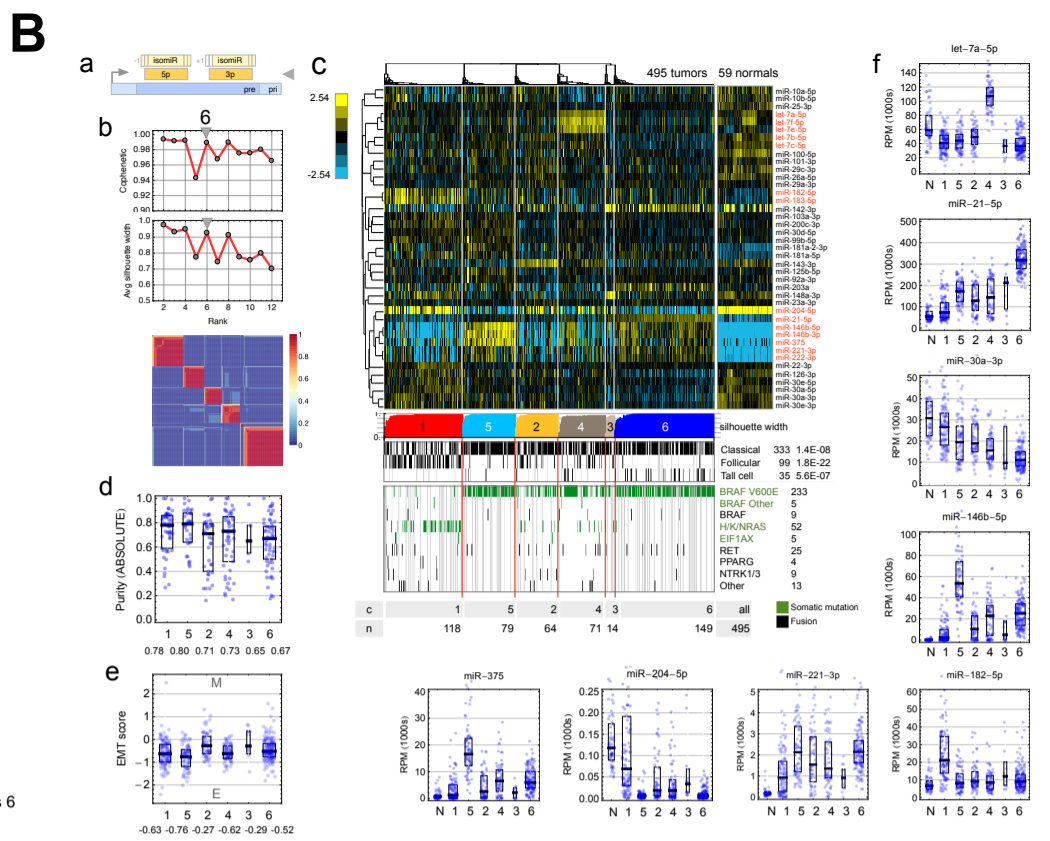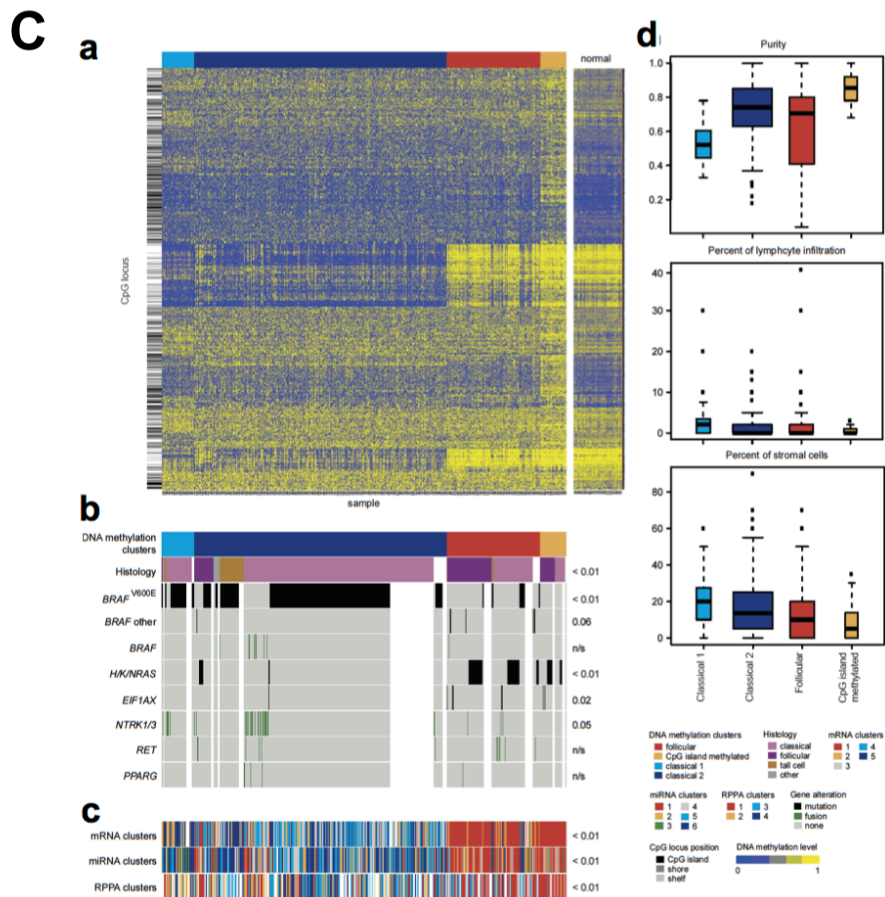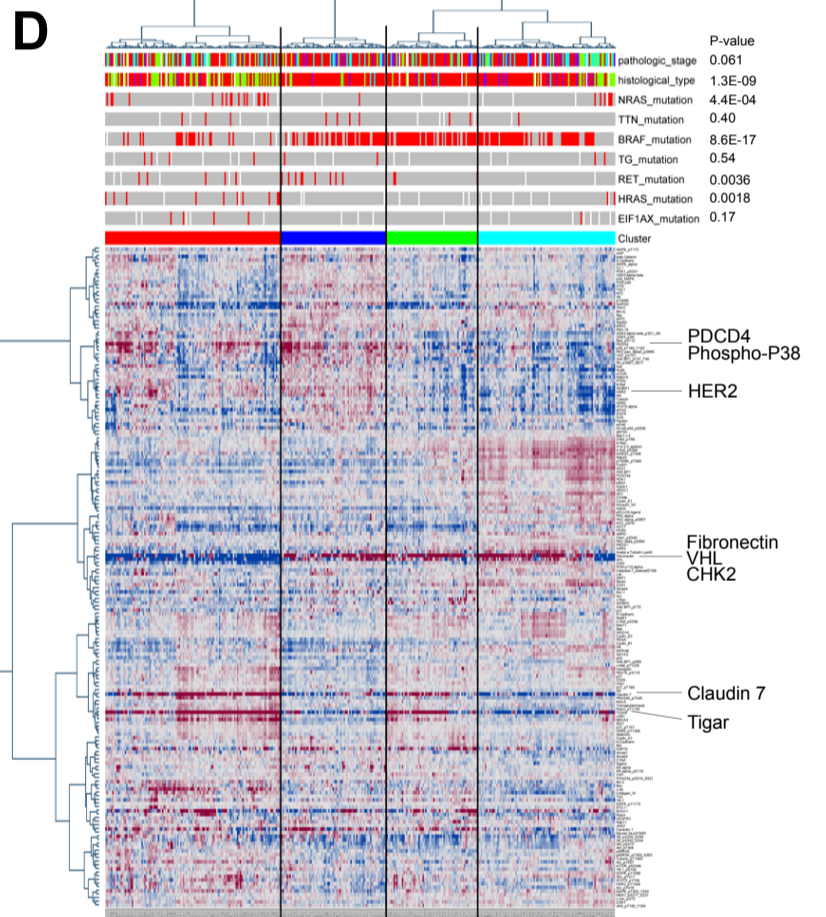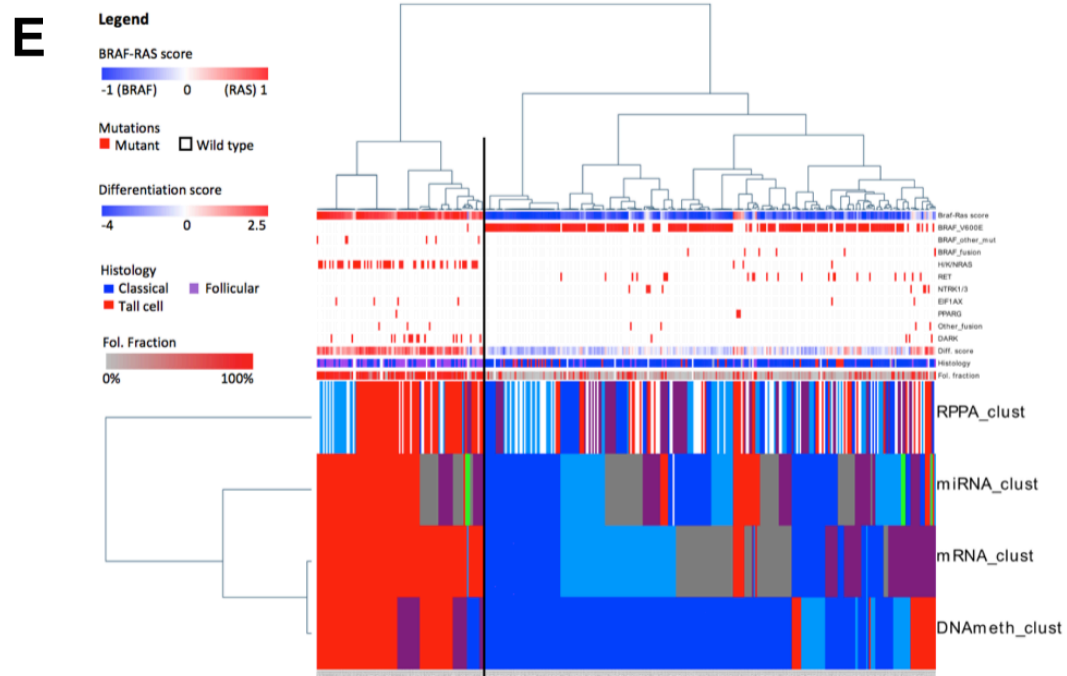

Supplement: NIHMS633017-supplement-9.pdf [file NIHMS633017-supplement-9.pdf]
